## Mitigation of chromosome loss in clinical CRISPR-Cas9-engineered T cells

Connor A. Tsuchida,<sup>1,2,29</sup> Nadav Brandes,<sup>3,29</sup> Raymund Bueno,<sup>3,29,30</sup> Marena Trinidad,<sup>2</sup> Thomas Mazumder,<sup>3</sup> Bingfei Yu,<sup>4,5</sup> Byungjin Hwang,<sup>3,31</sup> Christopher Chang,<sup>6-10</sup> Jamin Liu,<sup>1,11,32</sup> Yang Sun,<sup>3</sup> Caitlin R. Hopkins,<sup>12-16</sup> Kevin R. Parker,<sup>4,33</sup> Yanyan Qi,<sup>17</sup> Ansuman T. Satpathy,<sup>5,10,17</sup> Edward A. Stadtmauer,<sup>12,18</sup> Jamie H.D. Cate,<sup>19-21</sup> Justin Eyquem,<sup>8-10</sup> Joseph A. Fraietta,<sup>12-16</sup> Carl H. June,<sup>12-15</sup> Howard Y. Chang,<sup>4,5,22</sup> Chun Jimmie Ye,<sup>1,3,9,10,23-26,34</sup> Jennifer A. Doudna<sup>1,2,10,19-21,27,28,34</sup>

1. University of California, Berkeley - University of California, San Francisco Graduate Program in Bioengineering, University of California, Berkeley, Berkeley, CA, USA
2. Innovative Genomics Institute, University of California, Berkeley, Berkeley, CA, USA
3. Division of Rheumatology, Department of Medicine, University of California, San Francisco, San Francisco, CA, USA
4. Center for Personal Dynamic Regulomes, Stanford University, Stanford, CA, USA
5. Parker Institute for Cancer Immunotherapy, Stanford University School of Medicine, Stanford, CA, USA
6. Biomedical Sciences Graduate Program, University of California, San Francisco, San Francisco, CA, USA
7. Medical Scientist Training Program, University of California, San Francisco, San Francisco, CA, USA
8. Department of Medicine, University of California, San Francisco, San Francisco, CA, USA
9. Parker Institute for Cancer Immunotherapy, San Francisco, CA, USA
10. Gladstone-UCSF Institute of Genomic Immunology, San Francisco, CA, USA

- 26 11. Department of Biochemistry and Biophysics, University of California, San Francisco, San  
27 Francisco, CA, USA
- 28 12. Abramson Cancer Center, Perelman School of Medicine, University of Pennsylvania,  
29 Philadelphia, PA, USA
- 30 13. Parker Institute for Cancer Immunotherapy, Perelman School of Medicine, University of  
31 Pennsylvania, Philadelphia, PA, USA
- 32 14. Center for Cellular Immunotherapies, Perelman School of Medicine, University of  
33 Pennsylvania, Philadelphia, PA, USA
- 34 15. Department of Pathology and Laboratory Medicine, Perelman School of Medicine,  
35 University of Pennsylvania, Philadelphia, PA, USA
- 36 16. Department of Microbiology, Perelman School of Medicine, University of Pennsylvania,  
37 Philadelphia, PA, USA
- 38 17. Department of Pathology, Stanford University School of Medicine, Stanford, CA, USA
- 39 18. Division of Hematology-Oncology, Department of Medicine, Perelman School of  
40 Medicine, University of Pennsylvania, Philadelphia, PA, USA
- 41 19. Department of Molecular and Cell Biology, University of California, Berkeley, Berkeley,  
42 CA, USA
- 43 20. California Institute for Quantitative Biosciences (QB3), University of California, Berkeley,  
44 Berkeley, CA, USA
- 45 21. Molecular Biophysics and Integrated Bioimaging Division, Lawrence Berkeley National  
46 Laboratory, Berkeley, CA, USA
- 47 22. Howard Hughes Medical Institute, Stanford University, Stanford, CA, USA
- 48 23. Chan Zuckerberg Biohub, San Francisco, CA, USA
- 49 24. Institute for Human Genetics, University of California, San Francisco, San Francisco,  
50 CA, USA

- 51 25. Institute for Computational Health Sciences, University of California, San Francisco, San  
52 Francisco, CA, USA
- 53 26. Department of Epidemiology and Biostatistics, University of California, San Francisco,  
54 San Francisco, CA, USA
- 55 27. Department of Chemistry, University of California, Berkeley, Berkeley, CA, USA
- 56 28. Howard Hughes Medical Institute, University of California, Berkeley, Berkeley, CA, USA
- 57 29. These authors contributed equally to this work
- 58 30. Present address: BioMarin Pharmaceutical Inc., Novato, CA, USA
- 59 31. Present address: Severance Biomedical Science Institute, Yonsei University College of  
60 Medicine, Seoul, South Korea
- 61 32. Present address: Altos Labs, Redwood City, CA, USA
- 62 33. Present address: Cartography Biosciences, South San Francisco, CA, USA
- 63 34. Corresponding authors: ([jimmie.ye@ucsf.edu](mailto:jimmie.ye@ucsf.edu)), ([doudna@berkeley.edu](mailto:doudna@berkeley.edu))

64  
65  
66  
67  
68  
69  
70  
71  
72  
73  
74  
75  
76

77 **Summary**

78 CRISPR-Cas9 genome editing has enabled advanced T cell therapies, but occasional loss of the  
79 targeted chromosome remains a safety concern. To investigate whether Cas9-induced  
80 chromosome loss is a universal phenomenon and evaluate its clinical significance, we conducted  
81 a systematic analysis in primary human T cells. Arrayed and pooled CRISPR screens revealed  
82 that chromosome loss was generalizable across the genome and resulted in partial and entire  
83 loss of the chromosome, including in pre-clinical chimeric antigen receptor T cells. T cells with  
84 chromosome loss persisted for weeks in culture, implying the potential to interfere with clinical  
85 use. A modified cell manufacturing process, employed in our first-in-human clinical trial of Cas9-  
86 engineered T cells,<sup>1</sup> dramatically reduced chromosome loss while largely preserving genome  
87 editing efficacy. Expression of p53 correlated with protection from chromosome loss observed in  
88 this protocol, suggesting both a mechanism and strategy for T cell engineering that mitigates this  
89 genotoxicity in the clinic.

90

91

92

93

94

95

96

97

98

99

100

101

102

103 **Introduction**

104 The precision of CRISPR-Cas9 genome editing is paramount to ensure clinical safety and avoid  
105 unintended and permanent genotoxicities. Promiscuous off-target genome editing at unintended  
106 sites has been extensively studied<sup>2-4</sup> and mitigated<sup>5,6</sup> *in vitro* and *in vivo*. However, unintended  
107 chromosomal abnormalities following on-target genome editing, such as chromosome loss, have  
108 not been systematically investigated or prevented. Thus, these potential concerns for genome  
109 editing continue to persist, including in the clinic, at an unknown frequency.

110

111 T cells have been extensively engineered using Cas9 to develop potent immunotherapies for  
112 cancer<sup>1,7-9</sup> and autoimmune diseases.<sup>10,11</sup> In a previous study, low-level chromosome 14  
113 aneuploidy was detected in primary human T cells after Cas9-mediated genome editing of the *T*  
114 *cell receptor alpha constant (TRAC)* gene using one clinically relevant guide RNA (gRNA).<sup>12</sup>  
115 However, the extent to which chromosome loss occurs at other target sites, the determinants of  
116 this phenomenon, the behavior of T cells with Cas9-induced chromosome loss, and the clinical  
117 relevance of these findings remain unknown. Along with understanding this phenomenon,  
118 strategies to reduce or eliminate chromosome loss as an outcome of genome editing would  
119 improve the safety of engineered T cell therapies for patients.

120

121 Here, we analyzed chromosome loss following Cas9-induced genome editing at hundreds of sites  
122 across every somatic chromosome in the human genome to determine the frequency,  
123 determinants, and consequences of this phenomenon. We found Cas9-induced chromosome loss  
124 was a generalizable phenomenon, although it was specific to the chromosome targeted by Cas9,  
125 and was prevalent at sites across the genome. T cells with Cas9-induced chromosome loss had  
126 a fitness and proliferative disadvantage, yet could persist over multiple weeks of *ex vivo* culture.  
127 Surprisingly, chromosome loss also occurred during pre-clinical production of chimeric antigen  
128 receptor (CAR) T cells but was minimal or undetectable in Cas9-edited patient T cells from a first-

129 in-human phase 1 clinical trial. Further experimentation demonstrated that a modified T cell  
130 editing protocol employed in our clinical trial increased levels of the DNA damage response  
131 protein p53 while decreasing chromosome loss, suggesting a possible mechanism for Cas9-  
132 induced chromosome loss and an unexpected strategy to avoid this unintended outcome in  
133 patients.

134

## 135 **Results**

### 136 ***Single-cell RNA sequencing reveals chromosome loss in Cas9-edited T cells***

137 The *TRAC* locus, which encodes the T cell receptor (TCR) responsible for CD4 and CD8 T cell  
138 reactivity to peptide-MHC complexes, is of immense interest for genome editing applications in  
139 human T cells. For engineered adoptive T cell therapies, where T cells are armed with a  
140 transgenic receptor for targeted immunotherapy, disrupting endogenous TCR expression limits  
141 graft-versus-host toxicity associated with mispairing of transgenic and endogenous TCRs.<sup>13</sup>  
142 Additionally, abrogating the TCR is an important step towards developing allogeneic “off-the-shelf”  
143 T cell therapies that could reduce cell manufacturing costs and expand patient accessibility.<sup>14</sup>

144

145 To quantify chromosome loss after genome editing of *TRAC*, primary human T cells were  
146 nucleofected with *S. pyogenes* Cas9 ribonucleoprotein (RNP) including one of 11 different gRNAs  
147 tiled across the first exon of *TRAC* or a non-targeting gRNA (Fig. 1A). Reduced TCR expression  
148 occurred in 60-99% of all cells as measured by flow cytometry (Fig. S1A) and editing at the *TRAC*  
149 locus was observed in 62-97% of all genomic DNA sequencing reads (Fig. S1B), depending on  
150 the gRNA. Four days after Cas9 RNP introduction, T cells were subjected to multiplexed single-  
151 cell RNA sequencing (scRNA-seq) to detect reduced transcript levels resulting from chromosome  
152 loss caused by Cas9-mediated double-strand DNA breaks (DSBs) (Fig. S1C).<sup>15</sup> Transcriptome-  
153 wide analysis using existing computational methods revealed a reduction in gene dosage,  
154 specifically on chromosome 14, in cells with a *TRAC*-targeting gRNA compared to cells with a

155 non-targeting gRNA (Fig. 1B).<sup>16</sup> We further estimated the distribution of breakpoint loci across  
156 chromosome 14, finding the highest frequency to be near the known genomic location of our  
157 *TRAC*-targeting gRNAs (Fig. 1C). We observed cells with lower gene dosage originating at the  
158 Cas9 target site (partial chromosome loss) as well as cells with lower gene dosage across the  
159 entire chromosome (whole chromosome loss) (Fig. 1D). Overall, ~5-20% of T cells exhibited  
160 partial or whole loss of chromosome 14 depending on the *TRAC*-targeting gRNA (Fig. 1E, S1D,  
161 S1E, and S1F).

162

### 163 ***DNA-based droplet digital PCR is an orthogonal method to detect chromosome loss***

164 As an orthogonal approach to detect chromosome loss, we used droplet digital PCR (ddPCR) to  
165 directly quantify genomic DNA copy number, eliminating potential interference from transcriptional  
166 or epigenetic factors that may affect the scRNA-seq results. Two primer/probe sets were designed  
167 to amplify nearby regions of the target gene, one as a control (HEX) and the other spanning the  
168 Cas9 gRNA target site (FAM) so that a DSB and chromosome loss would inhibit amplicon  
169 generation (Fig. 1F). Three days after Cas9 nucleofection, genomic DNA harvested from *TRAC*-  
170 targeted T cells resulted on average in ~4-22% chromosome loss; these losses were highly  
171 reproducible across biological T cell donors (Fig 1G). Importantly, primers and probes in the  
172 amplicon spanning the intended Cas9 target site were positioned to avoid binding site disruption  
173 by small insertions and deletions (indels), the most common outcome after Cas9 genome editing.

174

175 Based on the observation that Cas9 preferentially remains bound to the non-protospacer adjacent  
176 motif (PAM) side of the target DNA after cleavage,<sup>17,18</sup> we wondered whether orientation of the  
177 PAM relative to the centromere influenced chromosome loss (Fig. S1G). However, we found no  
178 significant difference between targets where the PAM was distal or proximal to the centromere,  
179 relative to the gRNA spacer sequence (Fig. 1H). Furthermore, the rates of chromosome 14 loss

180 measured by scRNA-seq or ddPCR did not correlate with the efficacy of TCR disruption or  
181 genomic position targeted by different gRNAs (Fig. S1H and S1I).

182

### 183 ***Target-specific chromosome loss is a general phenomenon following genome editing***

184 To determine the generality of chromosome loss after genome editing, we conducted a  
185 comprehensive CRISPR screen using a library of 384 unique gRNAs targeting 3-7 genes on every  
186 somatic chromosome (92 genes in total) with four unique gRNA sequences targeting each gene  
187 (Fig. 2A, S2A, and S2B). CROP-seq was used to track gRNAs delivered to individual cells in our  
188 experiment because it avoids the template switching observed with other methods<sup>19,20</sup> and  
189 because it has been successfully deployed in primary human T cells.<sup>21</sup> Targets relevant to T cell  
190 genome engineering were prioritized, such as *TRAC*,<sup>1,22,23</sup> *TRBC*,<sup>1</sup> *PDCD1*,<sup>1</sup> *B2M*,<sup>24</sup> *IL2RA*,<sup>23</sup>  
191 *CXCR4*,<sup>25</sup> and *CIITA*,<sup>26</sup> as well as other targets of interest for clinical genome editing such as  
192 *BCL11A*<sup>27,28</sup> and *HBB*<sup>29,30</sup> for the treatment of sickle cell disease, *TTR* to treat transthyretin  
193 amyloidosis,<sup>31</sup> *HTT* to treat Huntington's disease,<sup>32</sup> and *SERPINA1* to treat alpha-1-antitrypsin  
194 deficiency.<sup>33</sup>

195

196 Using our previously established computational pipeline on the CROP-seq dataset, we  
197 determined the breakpoints and gene dosage for 92 different genes targeted by Cas9 (Fig. S1C,  
198 S1D, S1E, and S1F). For numerous genes targeted in our screen, we observed significant  
199 enrichment for loss of the targeted chromosome in cells with a corresponding gRNA compared to  
200 cells with a gRNA targeting a different chromosome (Fig. 2B). Chromosome loss above  
201 background levels occurred with 55% (201/364) of all gRNAs, for 89% (82/92) of all genes  
202 targeted, and in 100% (22/22) of all chromosomes targeted. Across all gRNAs, 3.25% of targeted  
203 cells had detectable whole or partial chromosome loss (Fig. S3A). For cells with a non-targeting  
204 gRNA, no detectable chromosome loss was identified on any somatic chromosome. Enrichment  
205 for chromosome loss was much higher in chromosomes targeted by Cas9 compared to non-



206 targeted chromosomes (Fig. 2C), suggesting that this phenomenon is an outcome of target-  
207 specific cleavage during Cas9-mediated genome editing.

208

209 We validated this genome-scale chromosome loss by selecting 15 gRNAs from the library and  
210 individually nucleofecting them as Cas9 RNPs into T cells. ddPCR was used to measure  
211 chromosome loss at various sites in the genome and showed greater levels of chromosome loss  
212 at the targeted site compared to non-targeted sites for nearly all gRNAs (Fig. 2D). Additionally,  
213 rates of chromosome loss were highly correlated (Spearman's correlation = 0.59) with those  
214 estimated by scRNA-seq (Fig. 2E).

215

216 Further analyses of the CROP-seq screen to investigate the contribution of the Cas9 gRNA  
217 sequence revealed no influence by gRNA binding orientation (Fig. S3B), nucleotide sequence  
218 (Fig. S3C and S3D), or GC content on chromosome loss (Fig. S3E). The computationally  
219 predicted dominant end-joining repair pathway, namely non-homologous end joining (NHEJ) or  
220 microhomology-mediated end joining (MMEJ), for each gRNA target also did not show a strong  
221 correlation with chromosome loss (Fig. S3F and S3G). However, we did observe a moderate  
222 correlation between the distance of each targeted gene from the centromere and the rate of  
223 chromosome loss induced (Fig. S3H), with gRNAs targeting closer to the centromere showing  
224 higher levels of chromosome loss.

225

### 226 ***Chromosome loss accompanies transcriptional signatures of DNA damage response,*** 227 ***apoptosis, and quiescence***

228 To assess the functional effects of Cas9-induced chromosome loss, we performed differential  
229 gene expression analysis between Cas9-edited T cells with or without chromosome loss. We  
230 identified genes that were differentially expressed across groups of cells with different  
231 chromosomes lost (Fig. 3A and S4A). *CD70*, for example, was significantly upregulated in every

232 group of cells with chromosome loss regardless of which chromosome was lost, and *MDM2* was  
233 significantly upregulated in every group of cells with chromosome loss except those that lost  
234 chromosomes 13 or 18. Meanwhile, *PHGDH* was downregulated in every group of cells with  
235 chromosome loss except those that lost chromosomes 6, 10, 18, or 21. The numerous genes that  
236 were differentially expressed across cells with various chromosomes lost suggests that these  
237 findings are not a result of expression changes from lowered dosage of the target gene, but a  
238 general influence of Cas9-induced chromosome loss.

239

240 Previous studies have demonstrated that a single Cas9-induced DSB can lead to p53  
241 upregulation.<sup>34</sup> Consistent with this finding, gene ontology analysis revealed the p53 DNA damage  
242 response and general apoptosis pathways were the most significantly overexpressed gene  
243 modules in cells with Cas9-induced chromosome loss (Fig. 3B). We also observed an increase in  
244 cell cycle markers associated with the G0 phase and a decrease in those associated with the S  
245 phase for T cells with chromosome loss compared to those without (Fig. 3C, S4B, and S4C),  
246 suggesting p53-induced cell cycle arrest. The results of both the differential gene expression  
247 analysis and cell cycle analysis indicate reduced fitness in T cells with Cas9-induced chromosome  
248 loss.

249

250 We further investigated the relationship between epigenetic markers and chromatin accessibility  
251 with Cas9-induced chromosome loss in primary human T cells; however, no significant correlation  
252 was found between these epigenetic factors and chromosome loss (Fig. 3D).

253

#### 254 ***T cells with chromosome loss persist ex vivo but with reduced fitness and proliferation***

255 To determine whether T cells with Cas9-induced chromosome loss persist over time, we used  
256 ddPCR to measure the extent of chromosome loss at various timepoints during *ex vivo* culture.  
257 We chose timepoints over 2-3 weeks, which is a similar length of *ex vivo* culture compared to the

258 manufacturing protocols of clinical trials with Cas9-edited T cells.<sup>1,7</sup> As expected, T cells treated  
259 with Cas9 RNP targeting *TRAC* showed the highest levels of DSBs one day after nucleofection  
260 (Fig. 4A), when Cas9 RNP is still present within cells and DNA repair is ongoing.<sup>35,36</sup> By day three  
261 post-treatment, DSBs plateaued until day 14 with most conditions showing a slight downward  
262 trend (Fig. 4A). Since Cas9 RNP-mediated cleavage and DNA repair go to completion within 24  
263 hours,<sup>37</sup> we posited that DSBs measured at day three and beyond are from unrepaired DSBs  
264 which we considered chromosome loss.

265  
266 We evaluated the temporal dynamics of chromosome loss over a longer period by repeating the  
267 experiment over the course of 21 days using four of the 11 *TRAC*-targeting gRNAs. Again, levels  
268 of chromosome loss showed a slight reduction over the three weeks, with detectable chromosome  
269 loss at the last timepoint remaining above that of non-targeting controls (Fig. S4D).

270  
271 To test the possibility that targeting a specific gene or chromosome may affect chromosome loss  
272 or T cell viability, we repeated the Cas9 nucleofection and genomic DNA ddPCR with 15 gRNAs  
273 targeting other genes throughout the genome. Culturing the genome edited T cells for 14 days  
274 and measuring chromosome loss at various timepoints throughout, we once again observed a  
275 gradual reduction in chromosome loss over time (Fig. 4B). These findings show that chromosome  
276 loss in T cells is observable as far out as 2-3 weeks, across multiple targeted genes and  
277 chromosomes. However, the gradual decrease in chromosome loss over time suggests a fitness  
278 disadvantage for T cells with this genomic aberration.

279  
280 We additionally tested whether chromosome loss was associated with a proliferative  
281 disadvantage in T cells. *TRAC*-edited T cells were stained with a cell proliferation dye and cultured  
282 for five days. Cells that underwent the highest and lowest amounts of proliferation, based on dye  
283 intensity, were sorted and chromosome loss was measured between the two groups.

284 Chromosome loss in the highest proliferating quartile was identifiable but statistically lower than  
285 chromosome loss in the lowest proliferating quartile (Fig. 4C), which suggests that Cas9-induced  
286 chromosome loss confers a proliferative disadvantage.

287

### 288 ***Gene insertion via homology-directed repair results in chromosome loss***

289 Thus far, we have shown that targeted chromosome loss can occur when using Cas9 to disrupt  
290 a desired gene, which predominantly occurs through end-joining DNA repair pathways.  
291 Tremendous effort has also been invested toward using Cas9 genome editing to correct a  
292 mutation or insert a gene by homology-directed repair (HDR). Since end-joining repair and HDR  
293 are divergent DNA repair pathways that involve different proteins, undergo different amounts of  
294 resection of the DSB ends, and occur in different stages of the cell cycle,<sup>38</sup> we wanted to  
295 determine whether chromosome loss after Cas9-mediated genome editing also occurs during  
296 HDR. To explore this, we used Cas9 RNPs with a gRNA targeting *CD5* and various  
297 oligonucleotide HDR templates to integrate a short hemagglutinin (HA) tag in-frame with *CD5*.<sup>39</sup>  
298 Successful generation of *CD5*<sup>+</sup>/*HA*<sup>+</sup> cells via HDR peaked as high as ~40% three or five after  
299 nucleofection (Fig. S5A). We performed ddPCR to quantify chromosome loss rates at both  
300 timepoints and observed similar levels of chromosome loss in *CD5*-targeted cells with an HDR  
301 template compared to *CD5*-targeted cells without an HDR template (Fig. S5B). Additionally, using  
302 *CD5* and other T cell surface markers, we attempted to use fluorescence-activated cell sorting to  
303 enrich for cells without chromosome loss; however, we observed no reduction in chromosome  
304 loss (Supplementary Note 1).

305

### 306 ***Pre-clinical CAR T cell generation results in chromosome loss***

307 While CAR T cells and transgenic TCR T cells are currently manufactured using a retrovirus or  
308 lentivirus to semi-randomly integrate the retargeting transgene, researchers have also used Cas9  
309 and HDR to precisely insert the transgene within the *TRAC* locus.<sup>22,39,40</sup> This approach, which

310 utilizes the native *TRAC* promoter to control expression of the CAR or retargeted TCR, offers  
311 advantages including uniform expression, minimal tonic signaling, and simultaneous disruption of  
312 the endogenous TCR. To explore whether chromosome loss occurs when generating pre-clinical  
313 CAR T cells via HDR, we nucleofected primary human T cells with Cas9 complexed with one of  
314 two *TRAC*-targeting gRNAs or a non-targeting gRNA. Just after nucleofection, recombinant  
315 adeno-associated virus 6 (AAV6) encoding a 1928 $\zeta$  CAR as an HDR template was added to the  
316 T cells (Fig. 5A and 5B).<sup>41,42</sup> Both the reduction of TCR expression and the gain of CAR expression  
317 were observed in two independent nucleofections; cells from one nucleofection were subjected  
318 to scRNA-seq at day four post-manufacturing, while cells from the other were subjected to scRNA-  
319 seq at day seven post-manufacturing. Overall rates of CAR integration via HDR were ~34-69%  
320 (Fig. S5C). In all conditions that received a *TRAC*-targeting gRNA, regardless of day or whether  
321 an HDR template was present, we observed an enrichment in chromosome 14 loss compared to  
322 conditions with a non-targeting gRNA (Fig. 5C, S5D, and S5E). When chromosome 14 loss  
323 enrichment was normalized to editing efficacy, since day four and day seven CAR T cells were  
324 engineered independently, we observed a slight decrease in chromosome 14 loss enrichment  
325 over time (Fig. 5D). Together, these data suggest that chromosome loss is a general phenomenon  
326 that occurs in Cas9-edited T cells, regardless of the DNA repair pathway involved. Our findings  
327 also indicate that cells with chromosome loss are present among pre-clinical, Cas9-edited CAR  
328 T cells, highlighting the importance of understanding and mitigating this genotoxicity in the context  
329 of engineered T cell therapies.

330

### 331 ***Investigation of chromosome loss in Cas9-edited T cells from clinical trial patients***

332 Our studies thus far have focused on *ex vivo* culturing of T cells; it is not yet known how these  
333 findings translate *in vivo*. We conducted a first-in-human phase 1 clinical trial (clinicaltrials.gov,  
334 trial NCT03399448) where Cas9 genome edited T cells were administered to patients with  
335 advanced, refractory cancer.<sup>1</sup> Autologous T cells from three cancer patients were collected and

336 electroporated with three different Cas9 RNPs, simultaneously targeting *TRAC*, *TRBC*, and  
337 *PDCD1*. These edited T cells were then transduced with a lentivirus encoding an HLA-A2\*0201-  
338 restricted TCR specific to a peptide from the NY-ESO1 and LAGE-1 cancer antigens, resulting in  
339 engineered T cells (NYCE). NYCE cells were infused back into the patients and were found to be  
340 well-tolerated.

341  
342 To investigate whether clinical manufacturing of a Cas9-edited adoptive T cell therapy results in  
343 levels of chromosome loss similar to those observed in our laboratory studies, we analyzed  
344 scRNA-seq data from NYCE cells of two patients at various timepoints throughout the clinical trial.  
345 Cells were collected from patient UPN35 prior to infusion and at day 28 post-infusion, while cells  
346 from patient UPN39 were collected prior to infusion as well as at days 10 and 113 post-infusion  
347 (Fig. 6A). Similar to our laboratory experiments, we inferred gene dosage at each of the target  
348 chromosomes (*TRAC*, Chr14; *TRBC*, Chr7; *PDCD1*, Chr2) and looked for partial and whole  
349 chromosome loss. Surprisingly, we observed extremely low levels of chromosome loss at the  
350 targeted chromosomes, which were not enriched compared to background levels at non-targeted  
351 chromosomes (Fig. 6B).

352

### 353 ***Order of operations during Cas9 genome editing impacts chromosome loss***

354 We wondered whether the discrepancy between the high rates of chromosome loss in our  
355 laboratory studies versus the low rates in our clinical trial could be attributed to the engineered T  
356 cell manufacturing protocol. In our laboratory studies, we activated and stimulated T cells prior to  
357 introducing Cas9 RNP and generating DSBs, while in our clinical trial we introduced Cas9 RNP  
358 and generated DSBs prior to activating and stimulating the T cells (Fig. 6C). We therefore  
359 performed Cas9 genome editing of *TRAC* in primary human T cells using our laboratory protocol  
360 (activation/stimulation followed by DSBs) and simulating our clinical protocol (DSBs followed by  
361 activation/stimulation) in parallel. Across all 11 *TRAC*-targeting gRNAs, we observed markedly

362 lower levels of chromosome loss using our clinical protocol compared to our laboratory protocol  
363 (Fig. S6A). However, genome editing with the clinical protocol on average resulted in ~14% lower  
364 indels compared to the laboratory protocol (Fig. S6B). To control for this difference, we normalized  
365 the rate of chromosome loss to the rate of indels generated per gRNA and still observed a  
366 statistically significant reduction in chromosome loss with our clinical protocol as compared to our  
367 laboratory protocol with 10 out of 11 gRNAs (Fig. 6D).

368  
369 Previous studies have shown that p53, a key protein in cell cycle regulation and apoptosis, also  
370 regulates T cell activation. Downregulation of p53 is critical for murine T cell proliferation.<sup>43</sup>  
371 Additionally, p53-mediated apoptosis has been shown as a mechanism for selecting against  
372 aneuploid cells.<sup>44</sup> Therefore, we tested whether differences in manufacturing protocol influenced  
373 p53 levels, and how that related to the chromosome loss we observed. Expression of *TP53*, which  
374 encodes p53, was measured via RT-qPCR at different timepoints throughout both T cell genome  
375 editing protocols. Similar to what was observed in murine T cells, expression of p53 was lowered  
376 in both protocols after human T cell activation/stimulation (Fig. 6E). The mean *TP53* expression  
377 across five biological donors was >10 times higher immediately prior to Cas9-induced DSBs in  
378 our clinical protocol compared to our laboratory protocol (Fig. 6E). Thus, *TP53* expression during  
379 Cas9-induced DSBs inversely correlated with rates of chromosome loss in T cells between our  
380 two protocols. For our clinical protocol, the higher expression of this key DNA damage response  
381 factor during Cas9-induced DSBs could select against cells with chromosome loss and explain  
382 the dramatically lower rates we observed. Implementation of this modified protocol for Cas9  
383 genome editing in T cells represents a simple adjustment that could substantially mitigate  
384 chromosome loss in future research and clinical studies.

385

386 **Discussion**

387 In this study, we comprehensively investigated the frequency and consequences of Cas9-induced  
388 chromosome loss in primary human T cells, taking a genome-scale approach to understand what  
389 influences this phenomenon and investigating both pre-clinical and clinical T cell therapies.  
390 Targeting Cas9 across the *TRAC* locus, we estimated chromosome loss in ~5-20% of cells  
391 depending on the gRNA. We discovered that Cas9-induced chromosome loss was a  
392 generalizable phenomenon; chromosome loss was observed across the genome in an average  
393 of 3.25% of T cells that were targeted by Cas9. These T cells showed detectable levels of  
394 chromosome loss over 2-3 weeks of *ex vivo* culture, though they displayed a fitness and  
395 proliferative disadvantage. These disadvantages could cause cells without chromosome loss to  
396 outgrow those with chromosome loss, explaining the gradual reduction in this chromosomal  
397 aberration measured over the multi-week culture. Importantly, we still detected chromosome loss  
398 in nearly all conditions at our final timepoint, and this 2-3 week timeframe is similar to current  
399 clinical adoptive T cell therapy manufacturing protocols.<sup>1,7</sup> This suggests that T cells with Cas9-  
400 induced chromosome loss could persist throughout *ex vivo* manufacturing and end up in the final  
401 product administered to patients. In addition, continued efforts aim to further shorten the  
402 engineered T cell manufacturing process, which has been shown to improve T cell activity and  
403 persistence but could result in higher levels of chromosome loss.<sup>45</sup>

404

405 To date, no study has investigated Cas9-induced chromosome loss in a clinical setting. In order  
406 to determine clinical significance, we generated CAR T cells using Cas9-mediated HDR, an  
407 approach being used in a growing number of clinical trials,<sup>8,9</sup> and found a significant enrichment  
408 in chromosome loss compared to non-targeted cells. We also investigated Cas9-edited T cells of  
409 two patients enrolled in a first-in-human phase 1 clinical trial. We previously reported detectable  
410 levels of Cas9-induced translocations, another unintended genomic aberration, in these patient T  
411 cells, though levels reduced to the limit-of-detection after *in vivo* circulation.<sup>1</sup> Surprisingly, when



412 we investigated patients' T cells for chromosome loss, we saw no enrichment above background  
413 levels, marking two of the few cases where we did not find Cas9-induced chromosome loss.

414

415 Comparing the results from our laboratory experiments (where substantial chromosome loss was  
416 detected) and the clinical trial (where we did not observe chromosome loss above background  
417 levels), there were multiple technical differences in the parameters used for chromosome loss  
418 estimation (Supplementary Note 2). We tried to account for these differences by downsampling  
419 the CROP-seq screen dataset so that its parameters were similar to the clinical trial dataset, which  
420 was sparser in data (Fig. S6C). Even upon downsampling, our estimations of chromosome loss  
421 in the CROP-seq screen were comparable to the original complete dataset (Fig. S6D). This  
422 supports the conclusion that biological rather than technical reasons explain the dramatic  
423 difference in chromosome loss estimation.

424

425 We considered and eliminated multiple factors that might correlate with or potentially explain  
426 Cas9-induced chromosome loss including Cas9 binding orientation, gRNA sequence, chromatin  
427 accessibility, and targeted gene or chromosome. Instead, we found that introducing Cas9-  
428 mediated DSBs prior to T cell activation/stimulation, a protocol used in our clinical trial but not in  
429 our laboratory experiments, influenced this phenomenon by significantly diminishing chromosome  
430 loss. It is possible that high levels of transcription in activated T cells during our laboratory protocol  
431 may predispose cells to chromosome loss due to genome instability caused by active  
432 transcription.<sup>46</sup> This effect could also be explained by levels of the DNA damage response protein  
433 p53 at the time of DSB generation, since we found *TP53* expression and chromosome loss were  
434 inversely correlated. Consistent with this hypothesis, a report in immortalized fibroblasts showed  
435 knockout of p53 increased Cas9-induced chromosomal truncations.<sup>47</sup> For engineering T cells,  
436 using the manufacturing protocol in which cells are activated after delivery of Cas9 could become  
437 standard practice to minimize chromosome loss in the manufactured product. This protocol

438 adjustment does not require novel equipment, modification of Cas9 or its gRNA, or additional  
439 cost, meaning it can be easily and immediately integrated into clinical practice.

440

441 Recently, several other Cas9-mediated chromosomal abnormalities such as translocations,<sup>1</sup> large  
442 deletions,<sup>48,49</sup> loss of heterozygosity,<sup>50</sup> and chromothripsis<sup>51</sup> have been reported. Of these, only  
443 methods and technologies for limiting translocations have been demonstrated, including serial  
444 rather than simultaneous multiplexed genome editing,<sup>52</sup> use of Cas12 nucleases,<sup>53</sup> fusion of Cas9  
445 to an exonuclease to limit repeat cleavage,<sup>54</sup> or utilizing base editors that do not generate DSBs.<sup>55</sup>  
446 Along with our modified clinical protocol, additional technologies could be developed to similarly  
447 mitigate chromosome loss.

448

449 CRISPR-based technologies that do not generate a DSB, such as base editors or epigenome  
450 editors, would likely avoid high levels of chromosome loss.<sup>56,57</sup> However, base editing can only  
451 modify one or a few nucleotides and epigenetic editing lacks permanence; neither of these  
452 technologies are ideal for permanent gene disruption or gene insertion. The use of CRISPR-Cas9  
453 genome editing that creates DSBs is still highly advantageous and will continue to expand in  
454 clinical use. Therefore, mitigating genomic aberrations from DSBs, such as chromosome loss, will  
455 have substantial value to avoid potential genotoxicity in patients. Our comprehensive study  
456 suggests that although chromosome loss is a universal consequence of site-specific Cas9  
457 genome editing, protocol adjustments and further exploration of underlying mechanisms can  
458 minimize its occurrence and impact.

459

#### 460 ***Limitations of the Study***

461 To determine the generalizability of Cas9-induced chromosome loss, we performed a CROP-seq  
462 CRISPR screen targeting several genes on each somatic chromosome. The emergence of higher  
463 throughput scRNA-seq may allow this study to be expanded to a genome-wide screen in the

464 future. Additionally, where possible we selected highly active and specific gRNAs from previously  
465 reported studies to include in our CROP-seq library. However, since we cannot reliably measure  
466 genome editing efficacy in our pooled format, it is possible that gRNAs with low chromosome loss  
467 detected simply had low cleavage activity. Finally, sequencing quality and computational gene  
468 calling varied between experiments (Supplementary Note 2). Since this could influence our  
469 chromosome loss measurements, we primarily displayed relative chromosome loss enrichment,  
470 which was normalized to a non-targeting gRNA or untreated sample, rather than absolute  
471 chromosome loss.

472

## 473 **Star Methods**

### 474 *Cell culture*

475 Primary adult peripheral blood mononuclear cells (PBMCs) were obtained as cryopreserved vials  
476 from Allcells Inc. CD3<sup>+</sup> T cells were isolated from PBMCs using EasySep Human T Cell Isolation  
477 Kits (StemCell Technologies) according to the manufacturer's instructions. Isolated CD3<sup>+</sup> T cells  
478 were cultured in X-Vivo 15 medium (Lonza) with 5% fetal bovine serum (FBS) (VWR), 50  $\mu$ M 2-  
479 mercaptoethanol, and 10 mM N-acetyl L-cysteine (Sigma-Aldrich). One day post-isolation, CD3<sup>+</sup>  
480 T cells were activated and stimulated with a 1:1 ratio of anti-human CD3/CD28 magnetic  
481 Dynabeads (Thermo Fisher) to cells, as well as 5 ng/mL IL-7 (PeproTech), 5 ng/mL IL-15 (R&D  
482 Systems), and 300 U/mL IL-2 (PeproTech) for three days. After the initial activation and  
483 stimulation, magnetic beads were removed and T cells were cultured in medium with 300 U/mL  
484 IL-2. Medium was replaced every other day and T cells were maintained at a density of  $\sim$ 0.5-  
485  $1 \times 10^6$  cells/mL.

486

487 For CAR T cell experiments, primary adult PBMCs were obtained as Leukopaks (StemCell  
488 Technologies) from deidentified healthy donors and cryopreserved in RPMI medium  
489 supplemented with 20% human serum and 10% DMSO. T cells were isolated as described before

490 and cultured in X-Vivo 15 medium supplemented with 5% human serum, 5 ng/mL IL-7 (Miltenyi  
491 Biotec), and 5 ng/mL IL-15 (Miltenyi Biotec). Immediately after isolation, T cells were stimulated  
492 for two days with anti-human CD3/CD28 magnetic Dynabeads (Thermo Fisher) using a 1:1 bead-  
493 to-cell ratio.

494

#### 495 *Cas9 ribonucleoprotein nucleofection*

496 100 pmol Alt-R crRNA and 100 pmol Alt-R tracrRNA (IDT) were diluted in IDT Duplex Buffer,  
497 incubated at 90° C for 5 min, and then slow cooled to room temperature (Supplementary Tables  
498 1, 7-8). 50 pmol *S. pyogenes* Cas9 V3 (IDT) was diluted in RNP buffer (20 mM HEPES, 150 mM  
499 NaCl, 10% Glycerol, 1 mM MgCl<sub>2</sub>, pH 7.5). Cas9 and duplexed gRNA (1:2 molar ratio) were  
500 incubated at 37° C for 15 min. Primary human T cells were washed once with PBS (-/-) before  
501 250,000 cells were resuspended in P3 Buffer (Lonza). 50 pmol Cas9 RNP was added to the cells  
502 before nucleofection in a Lonza 4D-Nucleofector with pulse code EH-115. X-Vivo 15 medium with  
503 300 U/mL IL-2 was added to the nucleofected cells before a 30 min recovery at 37° C.  
504 Nucleofected T cells were plated at a density of ~0.5-1x10<sup>6</sup> cells/mL in 96-well U-bottom plates.

505

#### 506 *TCR flow cytometry*

507 T cells were resuspended in Cell Staining Buffer (BioLegend) with Ghost Dye Red 780 (1:1,000,  
508 TonboBio) and anti-human TCR  $\alpha/\beta$  Brilliant Violet 421 (1:100, BioLegend). Cells were stained  
509 for 30 min at 4° C in the dark. After staining, cells were washed with Cell Staining Buffer and  
510 analyzed on a Thermo Fisher Attune NXT Flow Cytometer with an autosampler. Over 20,000-  
511 100,000 cells were routinely collected and analyzed with FlowJo.

512

#### 513 *Next-generation sequencing of TRAC genome editing*

514 Genomic DNA from T cells was extracted with QuickExtract DNA Extraction Solution (Lucigen)  
515 by incubating resuspended cells for 10 minutes at room temperature before heating lysates at 65°  
516 C for 20 minutes then 95° C for 20 min. The region of *TRAC* containing the Cas9 target site was  
517 amplified from genomic DNA with Q5 High-Fidelity DNA polymerase (NEB) to add universal  
518 adaptors (Supplementary Table 2). Amplicons were cleaned with SPRIselect beads (Beckman  
519 Coulter) before a second round of PCR was performed to add unique i5 and i7 Illumina indices to  
520 each sample. Subsequent amplicons were cleaned again, and libraries were sequenced on an  
521 Illumina iSeq 100 (2x150 bp). FASTQ files were trimmed, merged, and analyzed for indels with  
522 CRISPResso2 ([crispresso2.pinellolab.org](https://crispresso2.pinellolab.org)).<sup>58</sup> For non-targeting conditions, sequencing from cells  
523 receiving Cas9 and a non-targeting gRNA was used as input to check for indels at a given region.  
524

#### 525 *Single-cell RNA sequencing with MULTI-seq barcoding*

526 Four days post-nucleofection, T cells were labeled via MULTI-seq as previously described.<sup>15</sup>  
527 Briefly, a lipid-modified oligonucleotide (LMO) was combined with a unique oligonucleotide  
528 barcode (Supplementary Tables 3 and 6) at a 1:1 molar ratio in PBS (-/-). 500,000 cells or fewer  
529 were washed twice with PBS (-/-) and then resuspended in PBS (-/-). The LMO/barcode solution  
530 was mixed with each cell suspension and incubated on ice for 5 minutes before addition of a co-  
531 anchor LMO and incubation on ice for an additional 5 minutes. Cold 1% BSA in PBS (-/-) was  
532 added to sequester free LMOs before washing cells twice with cold 1% BSA in PBS (-/-). Uniquely  
533 labeled cells were pooled in equal numbers in 1% BSA in PBS (-/-) to a final concentration of  
534 ~1,600 cells/mL. 10x Genomics Chromium Next GEM Single Cell 3' Gene Expression Kits (v3.1)  
535 were utilized according to the manufacturer's instructions, with the following modifications. Lanes  
536 of a standard Chromium chip were "super loaded" with ~50,000 cells to yield a target cell recovery  
537 of ~25,000 cells. During the cDNA amplification, 1  $\mu$ L of a 2.5  $\mu$ M MULTI-seq primer (see  
538 McGinnis et al.) was added. Supernatant from the cDNA bead cleanup was saved because it

539 contained the MULTI-seq barcode amplicon. Supernatants were further cleaned by addition of  
540 SPRIselect beads and isopropanol with a conventional magnetic bead cleanup protocol. 3.5 ng  
541 of each cleaned amplicon was used in a PCR reaction to add sequencing indices; the reactions  
542 included KAPA HiFi HotStart ReadyMix (Roche), a unique i5 primer, and a unique RPI i7 primer  
543 (Supplementary Table 3). The PCR reactions were cleaned with SPRIselect beads before final  
544 library QC. Gene expression and MULTI-seq barcode libraries were pooled 6:1 (molar ratio) and  
545 sequenced on an Illumina NovaSeq 600 S1 Flow Cell.

546

#### 547 *Single-cell RNA sequencing analysis*

548 Cell Ranger (v7.0) was used to process Chromium single cell data. cellranger count was  
549 performed with the parameters --r1-length=28 and --r2-length=90. For the first TRAC-targeting  
550 experiment the --force-cells parameter was set to 15,000 cells. To demultiplex the different pools  
551 of cells using the MULTI-seq barcode, cellranger multi was performed. The results from the  
552 different pools were aggregated using cellranger aggr. The results from cellranger were parsed  
553 with scanpy and converted to a h5ad file format. The demultiplexed results were added as  
554 metadata to the h5ad file.

555

556 For the CROP-seq screen, we counted the number of reads within each cell aligning to each of  
557 the gRNAs used in the screen. To determine which cells were targeted by a single, unique gRNA,  
558 we tested whether the gRNA with the highest number of reads had significantly more reads than  
559 the second highest. Specifically, let  $c_1$  and  $c_2$  be the number of reads for the first and second most  
560 common gRNAs in a cell, respectively. To test whether  $c_1$  is significantly greater than  $c_2$ , we  
561 calculated a  $P$ -value based on a binomial distribution with parameters  $n = c_1 + c_2$  and  $p =$   
562  $0.5$  (i.e.  $x \sim B(c_1 + c_2, 0.5)$ ). If the probability of  $x \geq c_1$  was smaller than 0.05, the cell was  
563 determined to be transduced by a single gRNA.

564

565 *Quantification of chromosome loss from scRNA-seq*

566 To assess the dosage of each gene in each cell, inferCNV of the Trinity CTAT project  
567 (<https://github.com/broadinstitute/infercnv>) was executed in R (version 4.1) with default  
568 parameters over the h5ad dataset created by cellranger (see previous section) for every scRNA-  
569 seq dataset.<sup>16</sup> Each cell with a gRNA was labeled as a “treatment” and each cell with a non-  
570 targeted gRNA was labeled as a “control.” To successfully run inferCNV for the CROP-seq  
571 screen, inferCNV was performed in multiple batches of 30,000 cells.

572

573 The output of inferCNV was the estimated dosage for each gene; according to the software’s  
574 specifications, values below 0.95 were considered loss of at least one copy of the gene. inferCNV  
575 values for each gene were binarized as  $<0.95$  or  $\geq 0.95$ . Each chromosome in each cell was then  
576 searched for the interval between two genes that maximizes the difference between the average  
577 binarized inferCNV values on either side of the interval. This interval was the candidate breakage  
578 point for a particular chromosome in a cell.

579

580 We used the inferCNV values for all genes on a given chromosome within each cell (with respect  
581 to each of the 22 somatic chromosomes) to estimate the loss status of that chromosome.  
582 Specifically, we estimated whether there was 1) no chromosome loss, 2) whole chromosome loss,  
583 or 3) partial chromosome loss. If at least 70% of a minimum 150 genes to either the left or right  
584 of the candidate breakage point were below the 0.95 threshold, but less than 70% of the genes  
585 on the other side were below the threshold, the cell was labeled as partial chromosome loss for  
586 that chromosome. Otherwise, if at least 70% of all the genes throughout the entire chromosome  
587 were below the threshold, the cell was labeled as having whole chromosome loss for that  
588 chromosome. If neither were true, the cell was labeled as having no chromosome loss for that  
589 chromosome.

590

591 Downsampling of the CROP-seq screen dataset was performed to assess the dependency of  
592 chromosome loss enrichment on the number of genes in the inferCNV output. To do this, 4,000  
593 or 1,000 genes contained within the 9,639 gene output of the full CROP-seq inferCNV output  
594 were randomly sampled. Our chromosome loss calling pipeline, as described above, was then  
595 performed on these downsampled datasets.

596

### 597 *Droplet digital quantitative PCR*

598 Genomic DNA was collected from T cells at different times post-nucleofection with QuickExtract  
599 DNA Extraction Solution, identical to as described earlier. The ddPCR setup was similar to what  
600 has been previously described.<sup>37</sup> For multiplexed ddPCR, two ~200 bp amplicons for each target  
601 gene were designed (Supplementary Tables 4, 7, and 8). Amplicon 1 was located proximal to the  
602 centromere and utilized a hexachlorofluorescein-labeled (HEX) oligonucleotide probe (PrimeTime  
603 qPCR probes, Zen double quencher, IDT). Amplicon 2 was located ~100-200 bp away from  
604 amplicon 1, was distal relative to the centromere, and utilized a 6-fluorescein-labeled (FAM)  
605 oligonucleotide probe (PrimeTime qPCR probes, Zen double quencher, IDT). Amplicon 1 served  
606 as a control, which should be unaffected by Cas9 genome editing or chromosome loss and would  
607 signal whether the gene of interest was in a given droplet. Amplicon 2 spanned the Cas9 target  
608 site, with the probe located ~30-60 bp away from the cleavage site. If the target site was not  
609 successfully repaired after Cas9 cleavage, amplicon 2 would not be able to be amplified and the  
610 FAM probe would be unable to dissociate from its quencher. ddPCR reactions were assembled  
611 with ddPCR Supermix for Probes (No dUTP, Bio-Rad), 900 nM of each primer, 250 nM of each  
612 probe, and 10-30 ng of genomic DNA. Droplets were formed using a Bio-Rad QX200 Droplet  
613 Generator following the manufacturer's instructions before thermal cycling. The following day,  
614 ddPCR droplets were analyzed on a Bio-Rad QX200 Droplet Reader. Data were analyzed with  
615 the QX Manager Software (Bio-Rad), and thresholds were set manually based on wells with  
616 untreated samples. The percentage of alleles with chromosome loss was calculated based on



617 droplets that had the target amplicon 1 (HEX+) but were unable to produce the neighboring  
618 amplicon 2 (FAM-). The equation utilized is as follows: % *Chromosome loss* =  $100 \times \left(1 - \frac{[FAM]}{[HEX]}\right)$ .

619

#### 620 *Genome-scale CROP-seq CRISPR screen design*

621 The CROP-seq library was designed to contain multiple gRNAs that target multiple genes on  
622 every chromosome. When possible, validated gRNA sequences from previous publications were  
623 utilized (Supplementary Table 5). The gRNA library was ordered as an oPool oligo pool (IDT) and  
624 Golden Gate cloned into a custom CROP-seq vector that co-expressed GFP. To analyze the  
625 library, primers were used to amplify the gRNA spacer from either the plasmid library or genomic  
626 DNA library before sequencing on an Illumina iSeq. MAGECK  
627 (<https://sourceforge.net/p/mageck/wiki/Home/>) was used to quantify the representation of each  
628 gRNA in the library.<sup>59</sup>

629

#### 630 *CROP-seq CRISPR screen lentiviral production*

631 For lentivirus production, Human Embryonic Kidney 293T (HEK293T) cells were cultured in  
632 Dulbecco's Modified Eagle Medium (Gibco) with 10% FBS and 1% penicillin/streptomycin (Gibco).  
633 HEK293Ts were transfected at 70-90% confluency with 10 µg CROP-seq gRNA plasmid, 10 µg  
634 Gag-pol expression plasmid (psPax2, gift from Didier Trono, Addgene plasmid #12260), and 1 µg  
635 pCMV-VSV-G plasmid (gift from Bob Weinberg, Addgene plasmid #121669) using  
636 polyethylenimine (PEI, Polysciences Inc.) at a 3:1 PEI:plasmid ratio. Approximately 6-8 hours  
637 after transfection, the medium was aspirated from cells and replaced with Opti-Mem (Gibco).  
638 Supernatant containing lentivirus was collected 48 hours after transfection, the medium was  
639 replaced, and medium was collected once more after an additional 48 hours. Viral supernatants  
640 were filtered through a 0.45 µm PES membrane bottle top filter (Thermo Fisher) and then  
641 concentrated with Lenti-X Concentrator (Takara) according to the manufacturer's instructions.

642 Purified and concentrated lentivirus was used immediately or stored at  $-80^{\circ}$  C. Lentivirus was  
643 titered by counting the number of initially transduced cells, adding serial dilutions of lentivirus to  
644 primary human T cells, and measuring the percentage of GFP+ cells after three days (only in  
645 conditions with <30% GFP+ cells to ensure a majority were single transduction events).

646

#### 647 *CROP-seq CRISPR screen*

648 For the CROP-seq screen, primary human T cells were isolated and stimulated as stated  
649 previously. 24 hours after stimulation, lentivirus was added to the cells at a multiplicity of infection  
650 (MOI) of  $\sim 0.3$ . MOI was confirmed via flow cytometry two days later, at day three post-stimulation.  
651 Dynabeads were then removed from T cells and Cas9 was nucleofected as stated previously. For  
652 the full CROP-seq library experiment, four days post-nucleofection, T cells were subject to  
653 fluorescence-activated cell sorting (FACS) on a Sony SH800S cell sorter to enrich for GFP+ cells.  
654 Genomic DNA was harvested from a small number of cells, as previously described, to assess  
655 the library representation. The rest of the live/GFP+ cells were arbitrarily divided into six pools  
656 and subject to MULTI-seq barcoding and 10x Genomics scRNA-seq, as previously described.  
657 The CROP-seq gRNA was enriched from the resulting cDNA similar to what has been previously  
658 described (Supplementary Table 6).<sup>20</sup> Briefly, 25 ng of cDNA was added to eight separate KAPA  
659 HiFi HotStart ReadyMix PCR reactions and amplified for 10 cycles with an annealing temperature  
660 of  $65^{\circ}$  C to enrich for the gRNA. Individual PCR reactions were pooled together and cleaned with  
661 SPRIselect beads. 8  $\mu$ L of cleaned PCR1 product was added to a second KAPA HiFi HotStart  
662 ReadyMix PCR reaction and amplified for 10 cycles with an annealing temperature of  $65^{\circ}$  C to  
663 add Illumina sequencing adaptors. Gene expression, MULTI-seq barcode, and CROP-seq  
664 enrichment libraries were sequenced on an Illumina NovaSeq 600. Multiple iterations of library  
665 sequencing were concatenated to achieve the desired sequencing depth.

666

667 *Strand and MMEJ analyses*

668 Each gRNA was mapped using the GRCh38 genome assembly. A two-sided Fisher's Exact Test  
669 was performed to determine whether gRNAs binding distal or proximal to the centromere, relative  
670 to the gRNA spacer sequence, affected chromosome loss. MMEJ analyses were performed using  
671 inDelphi ([indelphi.giffordlab.mit.edu](http://indelphi.giffordlab.mit.edu)).<sup>60</sup> The cell type was set to K562s and the MMEJ strength  
672 was measured for each unique gRNA sequence.

673

674 *Differential gene expression analysis*

675 To identify genes differentially expressed between cells with and without chromosome loss, we  
676 used the memento algorithm with default parameters (capture rate = 0.07).<sup>61</sup> We tested each  
677 gene for differential expression with respect to each of the 22 somatic chromosomes separately,  
678 and only reported genes that were consistently over- or underexpressed across most  
679 chromosomes. We further ensured that the differences we observed were specific to the tested  
680 gene and were not the result of overall lower or greater levels of gene expression in cells with  
681 chromosome loss. To do this we accounted for the total expression of transcripts sharing the  
682 same chromosome as the tested gene by including the overall count of all transcripts on that  
683 chromosome as a covariate. This covariate was defined with respect to the chromosome  
684 containing the gene tested for differential expression and not with respect for the chromosome  
685 determining the two compared groups (cells with or without loss of that chromosome). Since  
686 memento supports only discrete covariates, we discretized the total transcript count into 10 decile  
687 bins.

688

689 We corrected the results of memento for multiple testing using FDR over the combined set of all  
690 tested genes over all tested chromosomes. We considered a gene to be statistically significant  
691 with respect to a chromosome (i.e. the gene to be over- or underexpressed in cells losing that  
692 chromosome) if its corrected *P*-value was below 0.05. Accordingly, we assigned the significance

693 status of that gene-chromosome combination to be 1, 0, or -1 if it was significantly overexpressed,  
694 not significant, or under expressed, respectively. We then assigned each gene a total score  
695 between -22 and 22 by summing the significance status of that gene with respect to each of the  
696 22 somatic chromosomes. 613 genes obtained a total score  $\geq 5$  and were considered the top  
697 overexpressed genes, while 590 obtained a total score  $\leq -5$  and were considered the top  
698 underexpressed genes.

699

700 We identified pathways enriched among the 613 top overexpressed genes by searching through  
701 the pathway terms defined in the KEGG database using the GSEAPy Python package.<sup>62,63</sup>

702

#### 703 *Cell cycle analysis*

704 Cell cycle states were defined using data and methods as previously described.<sup>64</sup>

705

#### 706 *Epigenetic analyses*

707 Datasets (ENCFF233TCT, ENCFF055FYI, and ENCFF129GAM) corresponding to activated T  
708 cells from a male donor (43 years old) were selected from the ENCODE Portal  
709 ([www.encodeproject.org](http://www.encodeproject.org)).<sup>65,66</sup> The presence of open chromatin from ATAC-seq data and the  
710 location of epigenetic marks (H3K9me3 and H3K36me3) from CHIP-seq data were determined  
711 within a 75 bp window around the GRCh38 coordinates of each gRNA and a  $P$ -value  $< 10^{-5}$ ,  
712 according to best practices.<sup>67</sup>

713

#### 714 *T cell proliferation tracking*

715 After isolation and stimulation, primary human T cells were nucleofected with Cas9 RNPs identical  
716 to what was described earlier. Immediately after nucleofection recovery, cells were pelleted and  
717 resuspended in 5  $\mu$ M CellTrace Violet (Invitrogen). Cells were incubated in CellTrace Violet for

718 20 min at 37° C, prior to diluting in 4x volume of complete X-Vivo 15 medium to absorb unbound  
719 dye and incubating again for 5 min at 37° C. Cells were pelleted and resuspended in complete X-  
720 Vivo 15 with 300 U/mL IL-2. T cells were passaged every other day to refresh medium and  
721 maintain a density of  $\sim 0.5\text{-}1 \times 10^6$  cells/mL. Cells were sorted on a BD FACSAria II to obtain the  
722 approximate bottom and top quartile of cells according to CellTrace Violet signal.

723

#### 724 *Cas9-mediated CD5 homology-directed repair*

725 HA tag insertion was achieved with either a single-stranded DNA HDR template (ssDNA HDRT),  
726 a double-stranded DNA HDR template (dsDNA HDRT), or a single-stranded DNA HDR template  
727 with Cas9 target sequences (ssCTS HDRT) (Supplementary Note 3).<sup>39</sup> Equimolar HDRT  
728 oligonucleotides were diluted in IDT Duplex Buffer, heated to 95° C for 5 minutes, then allowed  
729 to slow cool to room temperature. 100 pmol of HDRT was added to Cas9 RNP nucleofections of  
730 primary human T cells, identical to as described above. Cells were analyzed on a Thermo Fisher  
731 Attune NXT Flow Cytometer with an autosampler, identical to as described above, except with  
732 the antibodies anti-human CD5 (UCHT2)-PE (1:100, Invitrogen) and anti-HA (6E2)-AF647 (1:100,  
733 Cell Signaling Technology). Over 20,000-100,000 cells were routinely collected and analyzed with  
734 FlowJo.

735

#### 736 *Fluorescence-activated cell sorting of CD5, CD81, and CD3E*

737 Primary human T cells were nucleofected with Cas9 RNPs targeting *CD5* identical to what was  
738 described before. Seven days post-nucleofection, cells were stained with anti-human TCR  $\alpha/\beta$   
739 Brilliant Violet 421 (BioLegend), anti-human CD5 (UCHT2)-PE (Invitrogen), anti-human CD81  
740 (5A6)-FITC (BioLegend), and anti-human CD3E (SK7)-APC (Invitrogen), all at a 1:100 dilution.  
741 Cells were sorted on a BD FACSAria II to isolate different populations (Supplementary Note 1).

742

743 *CAR adeno-associated virus production*

744 An AAV transgene plasmid encoding the inverted terminal repeats, a 1928 $\zeta$  CAR, a truncated  
745 human EGFR (EGFRt) tag, and *TRAC* homology arms for HDR was used as previously described  
746 (Supplementary Note 4).<sup>41</sup> The AAV plasmid was packaged into AAV6 by transfection of  
747 HEK293T cells together with pHelper and pAAV Rep-Cap plasmids using PEI. The AAVs were  
748 purified using iodixanol gradient ultracentrifugation. The titration of the AAV was determined by  
749 quantitative PCR on DNaseI (NEB) treated and proteinase K (Qiagen) digested AAV samples,  
750 using primers against the left homology arm. The quantitative PCR was performed with SsoFast  
751 EvaGreen Supermix (Bio-Rad) on a StepOnePlus Real-Time PCR System (Applied Biosystems).

752

753 *CAR T cell production*

754 gRNAs targeting exon 1 of the *TRAC* locus (*TRAC* gRNA 12), the intron preceding the *TRAC*  
755 locus (*TRAC* gRNA 13), or a non-targeting control gRNA were purchased from Synthego and  
756 resuspended in TE buffer (Supplementary Table 9). Cas9 RNP was generated by incubating  
757 60 pmol of Cas9 protein with 120 pmol sgRNA. T cells were counted, resuspended in P3 buffer  
758 at  $2 \times 10^6$  per 20  $\mu$ L, mixed with 3  $\mu$ L of RNPs and added to a 96-well nucleofection plate. Cells  
759 were electroporated using a Lonza 4D-Nucleofector 96-well unit with the EH-115 protocol and  
760 immediately recovered by adding pre-warmed X-Vivo 15 medium without human serum.  
761 Recombinant AAV6 encoding the HDR template was added to the culture 30 to 60 min after  
762 nucleofection at an MOI of  $10^5$ , and incubated with the cells overnight. The day after the  
763 nucleofection and transduction, edited cells were resuspended in medium and expanded using  
764 standard culture conditions, keeping a density of  $10^6$  cells/mL. TCR disruption and CAR HDR  
765 efficiency was evaluated by flow cytometry by staining the TCR with anti-TCR $\alpha/\beta$  (BW242/412)-  
766 PE (1:50, Miltenyi) and the CAR with goat anti-mouse IgG (H+L) AlexaFluor 647 Fab (1:100,  
767 Jackson ImmunoResearch).

768

769 *CAR T cell scRNA-seq*

770 CAR T cells were harvested at two time points after independent nucleofections (day four and  
771 day seven post-nucleofection). TotalSeq-A0251-1 anti-human Hashtag reagents (BioLegend)  
772 were used to label different cell conditions. For the experiment, 500,000 cells from each condition  
773 were labeled with the hash antibodies in Cell Staining Buffer at 4° C for 30 min. After labeling,  
774 cells were washed three times with Cell Staining Buffer at 4° C and then resuspended in PBS (-  
775 /-) containing 0.04% BSA. Labeled cells were pooled and 50,000 cells were “super loaded” into  
776 four lanes (two lanes for day four samples and the other two lanes for day seven samples) of a  
777 10X Chromium Single-Cell G Chip. A 10x Genomics Chromium Next GEM Single Cell 3’ Gene  
778 Expression Kit (v3.1) was utilized according to the manufacturer’s instructions, and the  
779 subsequent library was sequenced on an Illumina NovaSeq 600 S4 Flow Cell.

780

781 *Laboratory versus clinical T cell manufacturing*

782 For the laboratory protocol, T cells were activated and stimulated identical to what was described  
783 earlier. After nucleofection of Cas9 RNP, T cells were cultured in X-Vivo 15 medium with 5 ng/mL  
784 IL-7, 5 ng/mL IL-15, and 300 U/mL IL-2.

785

786 For the clinical protocol, we followed a protocol similar to what was used in our phase 1 clinical  
787 trial<sup>1</sup>. After T cell isolation, cells were cultured in X-Vivo 15 medium with 5 ng/mL IL-7 and 5 ng/mL  
788 IL-15 for two days. Non-activated T cells were nucleofected with 50 pmol Cas9 RNP using a  
789 Lonza 4D-Nucleofector with pulse code EH-115. After nucleofection, cells were incubated in X-  
790 Vivo 15 medium with 5 ng/mL IL-7 and 5 ng/mL IL-15 for a 30 min recovery at 37° C. Nucleofected  
791 T cells were plated at a density of  $\sim 0.5 \times 10^6$  cells/mL in 96-well U-bottom plates. Two days after  
792 nucleofection, cells were counted and activated/stimulated with a 1:1 ratio of anti-human

793 CD3/CD28 magnetic Dynabeads to cells, as well as 5 ng/mL IL-7, 5 ng/mL IL-15, and 300 U/mL  
794 IL-2 for an additional three days.

795

#### 796 *T cell RT-qPCR*

797 During the laboratory or clinical T cell manufacturing protocols, 500,000 cells were periodically  
798 pelleted and resuspended in TRIzol (Invitrogen). RNA was isolated via phenol-chloroform  
799 extraction, precipitated by addition of isopropanol, washed with 75% ethanol, and resuspended  
800 in nuclease-free water. Isolated RNA was treated with TURBO DNase (Invitrogen) and  
801 SUPERase-In RNase inhibitor (Thermo Fisher) for 30 min at 37° C before addition of DNase  
802 Inactivation Reagent according to the manufacturer's instructions. DNA-free RNA underwent  
803 cDNA synthesis using SuperScript III Reverse Transcriptase (Invitrogen) and Random Primers  
804 (Promega) according to the manufacturer's instructions. qPCRs were performed with the resulting  
805 cDNA using iTaq Universal SYBR Green Supermix (Bio-Rad) on a Bio-Rad CFX96 Real-Time  
806 PCR Detection System (Supplementary Table 10). *TP53* expression levels were normalized to  
807 the expression levels of the housekeeping gene *GAPDH*, and to timepoint A (where the laboratory  
808 and clinical protocols start identically) using the  $\Delta\Delta C_t$  method.

809

#### 810 **Supplemental Information**

811

#### 812 **Acknowledgements**

813 The authors would like to thank Jennifer Hamilton, Matthew Kan, Elizabeth Abby Stahl, and David  
814 Colognori for thoughtful discussion throughout this project. We thank Christopher McGinnis and  
815 Zev Gartner for providing the MULTI-seq reagents; Yoon Gi Justin Choi (QB3 Functional  
816 Genomics Laboratory) for assistance with the scRNA-seq; Scarleth Chalen Ulloa for assistance  
817 with the FACSaria; Netra Krishnappa (IGI Center for Translational Genomics), Carrienne Miller  
818 (QB3 Genomics Sequencing Laboratory), and Eric Chow (UCSF Center for Advanced



819 Technology) for assistance with NGS; MinCheol Kim for assistance with the differential gene  
820 expression analysis; Francois Aguet for assistance with the cell cycle analysis; and Brian Shy for  
821 assistance with the CD5 HDR assay. We thank the patients, their families, and the clinical study  
822 team at the Abramson Cancer Center Clinical Research Unit for their involvement in the clinical  
823 trial. We thank all members of the Satpathy, Cate, Eyquem, Fraietta, June, Chang, Ye, and  
824 Doudna laboratories for their input and advice. C.A.T. is supported by a National Institutes of  
825 Health (NIH) Ruth L. Kirschstein National Research Service Award F31 Pre-Doctoral Fellowship  
826 (National Heart, Lung, and Blood Institute, F31HL156468-01) and the Siebel Scholarship (Siebel  
827 Foundation). B.Y. is supported by the Parker Institute for Cancer Immunotherapy Parker Bridge  
828 Fellowship and the V Foundation. This project was supported by the Parker Institute for Cancer  
829 Immunotherapy (A.T.S., J.E., C.H.J., H.Y.C., and C.J.Y.), the NIH National Institute of General  
830 Medical Sciences (R01-GM065050, J.H.D.C.), the NIH National Cancer Institute (R35CA209919,  
831 H.Y.C), the NIH Centers for Excellence in Genomic Science (RM1HG007735, H.Y.C;  
832 RM1HG009490, J.A.D.), the Howard Hughes Medical Institute (H.Y.C. and J.A.D.), the NIH  
833 National Institute of Arthritis and Musculoskeletal and Skin Diseases (R01AR071522, C.J.Y.), the  
834 NIH National Institute of Allergy and Infectious Diseases (R01AI136972, C.J.Y.), the Chan  
835 Zuckerberg Initiative and Chan Zuckerberg Biohub (C.J.Y.), and the NIH Somatic Cell Genome  
836 Editing Program of the Common Fund (U01AI142817-02, J.A.D.).

837

### 838 **Author Contributions**

839 C.A.T., J.H.D.C., and J.A.D. conceived the study with subsequent input from N.B., R.B., and  
840 C.J.Y. C.A.T., B.H., C.C., J.L., and Y.S. performed the T cell experiments and generated the  
841 laboratory scRNA-seq libraries. C.R.H. provided technical support on the clinical protocol. N.B.,  
842 R.B., M.T., and T.M. analyzed the laboratory scRNA-seq data. K.R.P. and Y.Q. generated the  
843 clinical trial scRNA-seq libraries. M.T., T.M., and B.Y analyzed the clinical trial scRNA-seq data.

844 A.T.S., E.A.S., J.H.D.C., J.E., J.A.F., C.H.J., H.Y.C., C.J.Y., and J.A.D. supervised the project.

845 C.A.T., N.B., C.J.Y., and J.A.D. wrote the manuscript with input from all other authors.

846

#### 847 **Declaration of Interests**

848 C.A.T, J.A.D., and the Regents of the University of California have patents pending or issued

849 related to the use of CRISPR genome editing technologies. R.B. is an employee of BioMarin

850 Pharmaceutical Inc., J.L. is an employee of Altos Labs, and K.R.P. is a co-founder and employee

851 of Cartography Biosciences. A.T.S is a co-founder of Immunai and Cartography Biosciences.

852 A.T.S. has received research support from Arsenal Biosciences, Allogene Therapeutics, and 10x

853 Genomics. J.H.D.C. is a co-founder of Initial Therapeutics. J.E. is a co-founder of Mnemo

854 Therapeutics, a scientific advisory board member of Cytovia Therapeutics, and a consultant for

855 Casdin Capital, Resolution Therapeutics, IndeeLabs, and Treefrog Therapeutics. J.E. has

856 received research support from Cytovia Therapeutics, Mnemo Therapeutics, and Takeda

857 Pharmaceutical Company. J.A.F has received research support from Tmunity. C.H.J. and the

858 University of Pennsylvania have patents pending or issued related to the use of gene modification

859 in T cells for adoptive T cell therapy. C.H.J. is a co-founder of Tmunity. H.Y.C. is a co-founder of

860 Accent Therapeutics, Boundless Bio, Cartography Biosciences, and Orbital Therapeutics, and an

861 advisor to 10x Genomics, Arsenal Biosciences, Chroma Medicine, Spring Discovery, and Vida

862 Ventures. C.J.Y is a co-founder of Survey Genomics, and a scientific advisory board member of

863 Related Sciences and Immunai. C.J.Y. is a consultant for Maze Therapeutics, TReX Bio, ImYoo,

864 and Santa Ana Bio. C.J.Y. has received research support from the Chan Zuckerberg Initiative,

865 Chan Zuckerberg Biohub, Genentech, BioLegend, ScaleBio, and Illumina. J.A.D. is a co-founder

866 of Editas Medicine, Intellia Therapeutics, Caribou Biosciences, Mammoth Biosciences, and

867 Scribe Therapeutics, and a scientific advisory board member of Intellia Therapeutics, Caribou

868 Biosciences, Mammoth Biosciences, Scribe Therapeutics, Vertex Pharmaceuticals, eFFECTOR

869 Therapeutics, Felix Biosciences, The Column Group, Inari, and Isomorphic Labs. J.A.D. is the

870 Chief Science Advisor at Sixth Street, an advisor at Tempus, and a Director at Johnson & Johnson  
871 and Altos Labs. J.A.D. has sponsored research projects through Biogen, Pfizer, Apple Tree  
872 Partners, Genentech, and Roche. All other authors declare no competing interests.

873

## 874 **References**

- 875 1. Stadtmauer, E.A., Fraietta, J.A., Davis, M.M., Cohen, A.D., Weber, K.L., Lancaster, E.,  
876 Mangan, P.A., Kulikovskaya, I., Gupta, M., Chen, F., et al. (2020). CRISPR-engineered T  
877 cells in patients with refractory cancer. *Science* 367, eaba7365. [10.1126/science.aba7365](https://doi.org/10.1126/science.aba7365).
- 878 2. Tsai, S.Q., Nguyen, N.T., Malagon-Lopez, J., Topkar, V.V., Aryee, M.J., and Joung, J.K.  
879 (2017). CIRCLE-seq: a highly sensitive in vitro screen for genome-wide CRISPR–Cas9  
880 nuclease off-targets. *Nat Methods* 14, 607–614. [10.1038/nmeth.4278](https://doi.org/10.1038/nmeth.4278).
- 881 3. Wienert, B., Wyman, S.K., Richardson, C.D., Yeh, C.D., Akcakaya, P., Porritt, M.J., Morlock,  
882 M., Vu, J.T., Kazane, K.R., Watry, H.L., et al. (2019). Unbiased detection of CRISPR off-  
883 targets in vivo using DISCOVER-Seq. *Science* 364, 286–289. [10.1126/science.aav9023](https://doi.org/10.1126/science.aav9023).
- 884 4. Bae, S., Park, J., and Kim, J.-S. (2014). Cas-OFFinder: a fast and versatile algorithm that  
885 searches for potential off-target sites of Cas9 RNA-guided endonucleases. *Bioinformatics*  
886 30, 1473–1475. [10.1093/bioinformatics/btu048](https://doi.org/10.1093/bioinformatics/btu048).
- 887 5. Kleinstiver, B.P., Pattanayak, V., Prew, M.S., Tsai, S.Q., Nguyen, N.T., Zheng, Z., and Joung,  
888 J.K. (2016). High-fidelity CRISPR–Cas9 nucleases with no detectable genome-wide off-  
889 target effects. *Nature* 529, 490–495. [10.1038/nature16526](https://doi.org/10.1038/nature16526).
- 890 6. Chen, J.S., Dagdas, Y.S., Kleinstiver, B.P., Welch, M.M., Sousa, A.A., Harrington, L.B.,  
891 Sternberg, S.H., Joung, J.K., Yildiz, A., and Doudna, J.A. (2017). Enhanced proofreading  
892 governs CRISPR–Cas9 targeting accuracy. *Nature* 550, 407–410. [10.1038/nature24268](https://doi.org/10.1038/nature24268).

- 893 7. Lu, Y., Xue, J., Deng, T., Zhou, X., Yu, K., Deng, L., Huang, M., Yi, X., Liang, M., Wang, Y.,  
894 et al. (2020). Safety and feasibility of CRISPR-edited T cells in patients with refractory non-  
895 small-cell lung cancer. *Nat Med* 26, 732–740. 10.1038/s41591-020-0840-5.
- 896 8. Zhang, J., Hu, Y., Yang, J., Li, W., Zhang, M., Wang, Q., Zhang, L., Wei, G., Tian, Y., Zhao,  
897 K., et al. (2022). Non-viral, specifically targeted CAR-T cells achieve high safety and efficacy  
898 in B-NHL. *Nature*, 1–6. 10.1038/s41586-022-05140-y.
- 899 9. Foy, S.P., Jacoby, K., Bota, D.A., Hunter, T., Pan, Z., Stawiski, E., Ma, Y., Lu, W., Peng, S.,  
900 Wang, C.L., et al. (2022). Non-viral precision T cell receptor replacement for personalized  
901 cell therapy. *Nature*, 1–3. 10.1038/s41586-022-05531-1.
- 902 10. Mackensen, A., Müller, F., Mougiakakos, D., Böltz, S., Wilhelm, A., Aigner, M., Völkl, S.,  
903 Simon, D., Kleyer, A., Munoz, L., et al. (2022). Anti-CD19 CAR T cell therapy for refractory  
904 systemic lupus erythematosus. *Nat Med* 28, 2124–2132. 10.1038/s41591-022-02017-5.
- 905 11. Mougiakakos, D., Krönke, G., Völkl, S., Kretschmann, S., Aigner, M., Kharboutli, S., Böltz,  
906 S., Manger, B., Mackensen, A., and Schett, G. (2021). CD19-Targeted CAR T Cells in  
907 Refractory Systemic Lupus Erythematosus. *New England Journal of Medicine* 385, 567–  
908 569. 10.1056/NEJMc2107725.
- 909 12. Nahmad, A.D., Reuveni, E., Goldschmidt, E., Tenne, T., Liberman, M., Horovitz-Fried, M.,  
910 Khosravi, R., Kobo, H., Reinstein, E., Madi, A., et al. (2022). Frequent aneuploidy in primary  
911 human T cells after CRISPR-Cas9 cleavage. *Nat Biotechnol.* 10.1038/s41587-022-01377-0.
- 912 13. Bendle, G.M., Linnemann, C., Hooijkaas, A.I., Bies, L., de Witte, M.A., Jorritsma, A., Kaiser,  
913 A.D.M., Pouw, N., Debets, R., Kieback, E., et al. (2010). Lethal graft-versus-host disease in  
914 mouse models of T cell receptor gene therapy. *Nat Med* 16, 565–570, 1p following 570.  
915 10.1038/nm.2128.

- 916 14. Depil, S., Duchateau, P., Grupp, S.A., Mufti, G., and Poirot, L. (2020). 'Off-the-shelf'  
917 allogeneic CAR T cells: development and challenges. *Nat Rev Drug Discov* 19, 185–199.  
918 10.1038/s41573-019-0051-2.
- 919 15. McGinnis, C.S., Patterson, D.M., Winkler, J., Conrad, D.N., Hein, M.Y., Srivastava, V., Hu,  
920 J.L., Murrow, L.M., Weissman, J.S., Werb, Z., et al. (2019). MULTI-seq: sample multiplexing  
921 for single-cell RNA sequencing using lipid-tagged indices. *Nat Methods* 16, 619–626.  
922 10.1038/s41592-019-0433-8.
- 923 16. Patel, A.P., Tirosh, I., Trombetta, J.J., Shalek, A.K., Gillespie, S.M., Wakimoto, H., Cahill,  
924 D.P., Nahed, B.V., Curry, W.T., Martuza, R.L., et al. (2014). Single-cell RNA-seq highlights  
925 intratumoral heterogeneity in primary glioblastoma. *Science* 344, 1396–1401.  
926 10.1126/science.1254257.
- 927 17. Sternberg, S.H., Redding, S., Jinek, M., Greene, E.C., and Doudna, J.A. (2014). DNA  
928 interrogation by the CRISPR RNA-guided endonuclease Cas9. *Nature* 507, 62–67.  
929 10.1038/nature13011.
- 930 18. Shibata, M., Nishimasu, H., Kodera, N., Hirano, S., Ando, T., Uchihashi, T., and Nureki, O.  
931 (2017). Real-space and real-time dynamics of CRISPR-Cas9 visualized by high-speed  
932 atomic force microscopy. *Nat Commun* 8, 1430. 10.1038/s41467-017-01466-8.
- 933 19. Datlinger, P., Rendeiro, A.F., Schmidl, C., Krausgruber, T., Traxler, P., Klughammer, J.,  
934 Schuster, L.C., Kuchler, A., Alpar, D., and Bock, C. (2017). Pooled CRISPR screening with  
935 single-cell transcriptome readout. *Nature Methods* 14, 297–301. 10.1038/nmeth.4177.
- 936 20. Hill, A.J., McFaline-Figueroa, J.L., Starita, L.M., Gasperini, M.J., Matreyek, K.A., Packer, J.,  
937 Jackson, D., Shendure, J., and Trapnell, C. (2018). On the design of CRISPR-based single-  
938 cell molecular screens. *Nat Methods* 15, 271–274. 10.1038/nmeth.4604.

- 939 21. Shifrut, E., Carnevale, J., Tobin, V., Roth, T.L., Woo, J.M., Bui, C.T., Li, P.J., Diolaiti, M.E.,  
940 Ashworth, A., and Marson, A. (2018). Genome-wide CRISPR Screens in Primary Human T  
941 Cells Reveal Key Regulators of Immune Function. *Cell*. 10.1016/j.cell.2018.10.024.
- 942 22. Eyquem, J., Mansilla-Soto, J., Giavridis, T., van der Stegen, S.J.C., Hamieh, M., Cunanan,  
943 K.M., Odak, A., Gönen, M., and Sadelain, M. (2017). Targeting a CAR to the TRAC locus  
944 with CRISPR/Cas9 enhances tumour rejection. *Nature* 543, 113–117.  
945 10.1038/nature21405.
- 946 23. Roth, T.L., Puig-Saus, C., Yu, R., Shifrut, E., Carnevale, J., Li, P.J., Hiatt, J., Saco, J.,  
947 Krystofinski, P., Li, H., et al. (2018). Reprogramming human T cell function and specificity  
948 with non-viral genome targeting. *Nature* 559, 405–409. 10.1038/s41586-018-0326-5.
- 949 24. Hamilton, J.R., Tsuchida, C.A., Nguyen, D.N., Shy, B.R., McGarrigle, E.R., Espinoza,  
950 C.R.S., Carr, D., Blaeschke, F., Marson, A., and Doudna, J.A. (2021). Targeted delivery of  
951 CRISPR-Cas9 and transgenes enables complex immune cell engineering. *Cell Reports* 35.  
952 10.1016/j.celrep.2021.109207.
- 953 25. Hou, P., Chen, S., Wang, S., Yu, X., Chen, Y., Jiang, M., Zhuang, K., Ho, W., Hou, W.,  
954 Huang, J., et al. (2015). Genome editing of CXCR4 by CRISPR/cas9 confers cells resistant  
955 to HIV-1 infection. *Sci Rep* 5, 15577. 10.1038/srep15577.
- 956 26. Deuse, T., Hu, X., Gravina, A., Wang, D., Tediashvili, G., De, C., Thayer, W.O., Wahl, A.,  
957 Garcia, J.V., Reichenspurner, H., et al. (2019). Hypoimmunogenic derivatives of induced  
958 pluripotent stem cells evade immune rejection in fully immunocompetent allogeneic  
959 recipients. *Nat Biotechnol* 37, 252–258. 10.1038/s41587-019-0016-3.

- 960 27. Wu, Y., Zeng, J., Roscoe, B.P., Liu, P., Yao, Q., Lazzarotto, C.R., Clement, K., Cole, M.A.,  
961 Luk, K., Baricordi, C., et al. (2019). Highly efficient therapeutic gene editing of human  
962 hematopoietic stem cells. *Nat Med* 25, 776–783. 10.1038/s41591-019-0401-y.
- 963 28. Frangoul, H., Altshuler, D., Cappellini, M.D., Chen, Y.-S., Domm, J., Eustace, B.K., Foell, J.,  
964 de la Fuente, J., Grupp, S., Handgretinger, R., et al. (2021). CRISPR-Cas9 Gene Editing for  
965 Sickle Cell Disease and  $\beta$ -Thalassemia. *New England Journal of Medicine* 384, 252–260.  
966 10.1056/NEJMoa2031054.
- 967 29. Dever, D.P., Bak, R.O., Reinisch, A., Camarena, J., Washington, G., Nicolas, C.E., Pavel-  
968 Dinu, M., Saxena, N., Wilkens, A.B., Mantri, S., et al. (2016). CRISPR/Cas9  $\beta$ -globin gene  
969 targeting in human haematopoietic stem cells. *Nature* 539, 384–389. 10.1038/nature20134.
- 970 30. DeWitt, M.A., Magis, W., Bray, N.L., Wang, T., Berman, J.R., Urbinati, F., Heo, S.-J., Mitros,  
971 T., Muñoz, D.P., Boffelli, D., et al. (2016). Selection-free genome editing of the sickle  
972 mutation in human adult hematopoietic stem/progenitor cells. *Sci. Transl. Med.* 8.  
973 10.1126/scitranslmed.aaf9336.
- 974 31. Gillmore, J.D., Gane, E., Taubel, J., Kao, J., Fontana, M., Maitland, M.L., Seitzer, J.,  
975 O’Connell, D., Walsh, K.R., Wood, K., et al. (2021). CRISPR-Cas9 In Vivo Gene Editing for  
976 Transthyretin Amyloidosis. *New England Journal of Medicine* 385, 493–502.  
977 10.1056/NEJMoa2107454.
- 978 32. Dabrowska, M., Juzwa, W., Krzyzosiak, W.J., and Olejniczak, M. (2018). Precise Excision of  
979 the CAG Tract from the Huntingtin Gene by Cas9 Nickases. *Frontiers in Neuroscience* 12.
- 980 33. Odate, S., Strapps, W., and Lescarbeau, R.M. (2023). Compositions and methods for  
981 treating alpha-1 antitrypsin deficiency.

- 982 34. Schirotti, G., Conti, A., Ferrari, S., della Volpe, L., Jacob, A., Albano, L., Beretta, S., Calabria,  
983 A., Vavassori, V., Gasparini, P., et al. (2019). Precise Gene Editing Preserves  
984 Hematopoietic Stem Cell Function following Transient p53-Mediated DNA Damage  
985 Response. *Cell Stem Cell* 24, 551-565.e8. 10.1016/j.stem.2019.02.019.
- 986 35. Kim, S., Kim, D., Cho, S.W., Kim, J., and Kim, J.-S. (2014). Highly efficient RNA-guided  
987 genome editing in human cells via delivery of purified Cas9 ribonucleoproteins. *Genome*  
988 *Res* 24, 1012–1019. 10.1101/gr.171322.113.
- 989 36. Mao, Z., Bozzella, M., Seluanov, A., and Gorbunova, V. (2008). Comparison of  
990 nonhomologous end joining and homologous recombination in human cells. *DNA Repair*  
991 (Amst) 7, 1765–1771. 10.1016/j.dnarep.2008.06.018.
- 992 37. Rose, J.C., Stephany, J.J., Valente, W.J., Trevillian, B.M., Dang, H.V., Bielas, J.H., Maly,  
993 D.J., and Fowler, D.M. (2017). Rapidly inducible Cas9 and DSB-ddPCR to probe editing  
994 kinetics. *Nat Methods* 14, 891–896. 10.1038/nmeth.4368.
- 995 38. Yeh, C.D., Richardson, C.D., and Corn, J.E. (2019). Advances in genome editing through  
996 control of DNA repair pathways. *Nature Cell Biology* 21, 1468–1478. 10.1038/s41556-019-  
997 0425-z.
- 998 39. Shy, B.R., Vykunta, V.S., Ha, A., Talbot, A., Roth, T.L., Nguyen, D.N., Pfeifer, W.G., Chen,  
999 Y.Y., Blaeschke, F., Shifrut, E., et al. (2022). High-yield genome engineering in primary cells  
1000 using a hybrid ssDNA repair template and small-molecule cocktails. *Nat Biotechnol*, 1–11.  
1001 10.1038/s41587-022-01418-8.
- 1002 40. Nguyen, D.N., Roth, T.L., Li, P.J., Chen, P.A., Apathy, R., Mamedov, M.R., Vo, L.T., Tobin,  
1003 V.R., Goodman, D., Shifrut, E., et al. (2020). Polymer-stabilized Cas9 nanoparticles and



- 1004 modified repair templates increase genome editing efficiency. *Nat Biotechnol* 38, 44–49.  
1005 [10.1038/s41587-019-0325-6](https://doi.org/10.1038/s41587-019-0325-6).
- 1006 41. Eyquem, J., Mansilla-Soto, J., Giavridis, T., van der Stegen, S.J.C., Hamieh, M., Cunanan,  
1007 K.M., Odak, A., Gönen, M., and Sadelain, M. (2017). Targeting a CAR to the *TRAC* locus  
1008 with CRISPR/Cas9 enhances tumour rejection. *Nature* 543, 113–117.  
1009 [10.1038/nature21405](https://doi.org/10.1038/nature21405).
- 1010 42. Brentjens, R.J., Davila, M.L., Riviere, I., Park, J., Wang, X., Cowell, L.G., Bartido, S.,  
1011 Stefanski, J., Taylor, C., Olszewska, M., et al. (2013). CD19-Targeted T Cells Rapidly  
1012 Induce Molecular Remissions in Adults with Chemotherapy-Refractory Acute Lymphoblastic  
1013 Leukemia. *Science Translational Medicine* 5, 177ra38-177ra38.  
1014 [10.1126/scitranslmed.3005930](https://doi.org/10.1126/scitranslmed.3005930).
- 1015 43. Watanabe, M., Moon, K.D., Vacchio, M.S., Hathcock, K.S., and Hodes, R.J. (2014).  
1016 Downmodulation of Tumor Suppressor p53 by T Cell Receptor Signaling Is Critical for  
1017 Antigen-Specific CD4+ T Cell Responses. *Immunity* 40, 681–691.  
1018 [10.1016/j.immuni.2014.04.006](https://doi.org/10.1016/j.immuni.2014.04.006).
- 1019 44. Li, M., Fang, X., Baker, D.J., Guo, L., Gao, X., Wei, Z., Han, S., van Deursen, J.M., and  
1020 Zhang, P. (2010). The ATM–p53 pathway suppresses aneuploidy-induced tumorigenesis.  
1021 *Proceedings of the National Academy of Sciences* 107, 14188–14193.  
1022 [10.1073/pnas.1005960107](https://doi.org/10.1073/pnas.1005960107).
- 1023 45. Svoboda, J., Gerson, J.N., Landsburg, D.J., Chong, E.A., Barta, S.K., Dwivedy Nasta, S.,  
1024 Ruella, M., Hexner, E.O., Marshall, A., Leskowitz, R., et al. (2022). Interleukin-18 Secreting  
1025 Autologous Anti-CD19 CAR T-Cells (huCART19-IL18) in Patients with Non-Hodgkin

- 1026 Lymphomas Relapsed or Refractory to Prior CAR T-Cell Therapy. *Blood* 140, 4612–4614.  
1027 10.1182/blood-2022-162393.
- 1028 46. Gómez-González, B., and Aguilera, A. (2019). Transcription-mediated replication hindrance:  
1029 a major driver of genome instability. *Genes Dev.* 33, 1008–1026. 10.1101/gad.324517.119.
- 1030 47. Cullot, G., Boutin, J., Toutain, J., Prat, F., Pennamen, P., Rooryck, C., Teichmann, M.,  
1031 Rousseau, E., Lamrissi-Garcia, I., Guyonnet-Duperat, V., et al. (2019). CRISPR-Cas9  
1032 genome editing induces megabase-scale chromosomal truncations. *Nat Commun* 10, 1136.  
1033 10.1038/s41467-019-09006-2.
- 1034 48. Adikusuma, F., Piltz, S., Corbett, M.A., Turvey, M., McColl, S.R., Helbig, K.J., Beard, M.R.,  
1035 Hughes, J., Pomerantz, R.T., and Thomas, P.Q. (2018). Large deletions induced by Cas9  
1036 cleavage. *Nature* 560, E8–E9. 10.1038/s41586-018-0380-z.
- 1037 49. Kosicki, M., Tomberg, K., and Bradley, A. (2018). Repair of double-strand breaks induced  
1038 by CRISPR-Cas9 leads to large deletions and complex rearrangements. *Nat Biotechnol* 36,  
1039 765–771. 10.1038/nbt.4192.
- 1040 50. Alanis-Lobato, G., Zohren, J., McCarthy, A., Fogarty, N.M.E., Kubikova, N., Hardman, E.,  
1041 Greco, M., Wells, D., Turner, J.M.A., and Niakan, K.K. (2021). Frequent loss of  
1042 heterozygosity in CRISPR-Cas9–edited early human embryos. *Proceedings of the National*  
1043 *Academy of Sciences* 118, e2004832117. 10.1073/pnas.2004832117.
- 1044 51. Leibowitz, M.L., Papathanasiou, S., Doerfler, P.A., Blaine, L.J., Sun, L., Yao, Y., Zhang, C.-  
1045 Z., Weiss, M.J., and Pellman, D. (2021). Chromothripsis as an on-target consequence of  
1046 CRISPR–Cas9 genome editing. *Nat Genet* 53, 895–905. 10.1038/s41588-021-00838-7.

- 1047 52. Bothmer, A., Gareau, K.W., Abdulkerim, H.S., Buquicchio, F., Cohen, L., Viswanathan, R.,  
1048 Zuris, J.A., Marco, E., Fernandez, C.A., Myer, V.E., et al. (2020). Detection and Modulation  
1049 of DNA Translocations During Multi-Gene Genome Editing in T Cells. *CRISPR J* 3, 177–  
1050 187. [10.1089/crispr.2019.0074](https://doi.org/10.1089/crispr.2019.0074).
- 1051 53. Xin, C., Yin, J., Yuan, S., Ou, L., Liu, M., Zhang, W., and Hu, J. (2022). Comprehensive  
1052 assessment of miniature CRISPR-Cas12f nucleases for gene disruption. *Nat Commun* 13,  
1053 5623. [10.1038/s41467-022-33346-1](https://doi.org/10.1038/s41467-022-33346-1).
- 1054 54. Yin, J., Lu, R., Xin, C., Wang, Y., Ling, X., Li, D., Zhang, W., Liu, M., Xie, W., Kong, L., et al.  
1055 (2022). Cas9 exo-endonuclease eliminates chromosomal translocations during genome  
1056 editing. *Nat Commun* 13, 1204. [10.1038/s41467-022-28900-w](https://doi.org/10.1038/s41467-022-28900-w).
- 1057 55. Webber, B.R., Lonetree, C., Kluesner, M.G., Johnson, M.J., Pomeroy, E.J., Diers, M.D.,  
1058 Lahr, W.S., Draper, G.M., Slipek, N.J., Smeester, B.A., et al. (2019). Highly efficient  
1059 multiplex human T cell engineering without double-strand breaks using Cas9 base editors.  
1060 *Nat Commun* 10, 5222. [10.1038/s41467-019-13007-6](https://doi.org/10.1038/s41467-019-13007-6).
- 1061 56. Porto, E.M., Komor, A.C., Slaymaker, I.M., and Yeo, G.W. (2020). Base editing: advances  
1062 and therapeutic opportunities. *Nat Rev Drug Discov* 19, 839–859. [10.1038/s41573-020-](https://doi.org/10.1038/s41573-020-0084-6)  
1063 [0084-6](https://doi.org/10.1038/s41573-020-0084-6).
- 1064 57. Nakamura, M., Gao, Y., Dominguez, A.A., and Qi, L.S. (2021). CRISPR technologies for  
1065 precise epigenome editing. *Nat Cell Biol* 23, 11–22. [10.1038/s41556-020-00620-7](https://doi.org/10.1038/s41556-020-00620-7).
- 1066 58. Clement, K., Rees, H., Canver, M.C., Gehrke, J.M., Farouni, R., Hsu, J.Y., Cole, M.A., Liu,  
1067 D.R., Joung, J.K., Bauer, D.E., et al. (2019). CRISPResso2 provides accurate and rapid  
1068 genome editing sequence analysis. *Nat Biotechnol* 37, 224–226. [10.1038/s41587-019-](https://doi.org/10.1038/s41587-019-0032-3)  
1069 [0032-3](https://doi.org/10.1038/s41587-019-0032-3).

- 1070 59. Li, W., Xu, H., Xiao, T., Cong, L., Love, M.I., Zhang, F., Irizarry, R.A., Liu, J.S., Brown, M.,  
1071 and Liu, X.S. (2014). MAGeCK enables robust identification of essential genes from  
1072 genome-scale CRISPR/Cas9 knockout screens. *Genome Biology* 15, 554. 10.1186/s13059-  
1073 014-0554-4.
- 1074 60. Shen, M.W., Arbab, M., Hsu, J.Y., Worstell, D., Culbertson, S.J., Krabbe, O., Cassa, C.A.,  
1075 Liu, D.R., Gifford, D.K., and Sherwood, R.I. (2018). Predictable and precise template-free  
1076 CRISPR editing of pathogenic variants. *Nature* 563, 646–651. 10.1038/s41586-018-0686-x.
- 1077 61. Kim, M.C., Gate, R., Lee, D.S., Lu, A., Gordon, E., Shifrut, E., Marson, A., Ntranos, V., and  
1078 Ye, C.J. (2022). memento: Generalized differential expression analysis of single-cell RNA-  
1079 seq with method of moments estimation and efficient resampling. 2022.11.09.515836.  
1080 10.1101/2022.11.09.515836.
- 1081 62. Kanehisa, M., and Goto, S. (2000). KEGG: Kyoto Encyclopedia of Genes and Genomes.  
1082 *Nucleic Acids Res* 28, 27–30.
- 1083 63. Fang, Z., Liu, X., and Peltz, G. (2023). GSEAPy: a comprehensive package for performing  
1084 gene set enrichment analysis in Python. *Bioinformatics* 39, btac757.  
1085 10.1093/bioinformatics/btac757.
- 1086 64. Macosko, E.Z., Basu, A., Satija, R., Nemesh, J., Shekhar, K., Goldman, M., Tirosh, I.,  
1087 Bialas, A.R., Kamitaki, N., Martersteck, E.M., et al. (2015). Highly Parallel Genome-wide  
1088 Expression Profiling of Individual Cells Using Nanoliter Droplets. *Cell* 161, 1202–1214.  
1089 10.1016/j.cell.2015.05.002.
- 1090 65. Dunham, I., Kundaje, A., Aldred, S.F., Collins, P.J., Davis, C.A., Doyle, F., Epstein, C.B.,  
1091 Fietze, S., Harrow, J., Kaul, R., et al. (2012). An integrated encyclopedia of DNA elements  
1092 in the human genome. *Nature* 489, 57–74. 10.1038/nature11247.

1093 66. Sloan, C.A., Chan, E.T., Davidson, J.M., Malladi, V.S., Strattan, J.S., Hitz, B.C., Gabdank,  
1094 I., Narayanan, A.K., Ho, M., Lee, B.T., et al. (2016). ENCODE data at the ENCODE portal.  
1095 *Nucleic Acids Res* 44, D726–D732. 10.1093/nar/gkv1160.

1096 67. Zhang, Y., Liu, T., Meyer, C.A., Eeckhoute, J., Johnson, D.S., Bernstein, B.E., Nusbaum,  
1097 C., Myers, R.M., Brown, M., Li, W., et al. (2008). Model-based Analysis of ChIP-Seq  
1098 (MACS). *Genome Biol* 9, R137. 10.1186/gb-2008-9-9-r137.

1099

1100

1101

1102

1103

1104

1105

1106

1107

1108

1109

1110

1111

1112

1113

1114

1115

1116

1117

1118 **Figure 1: CRISPR-Cas9 genome editing of *TRAC* results in whole and partial chromosome**  
 1119 **loss**

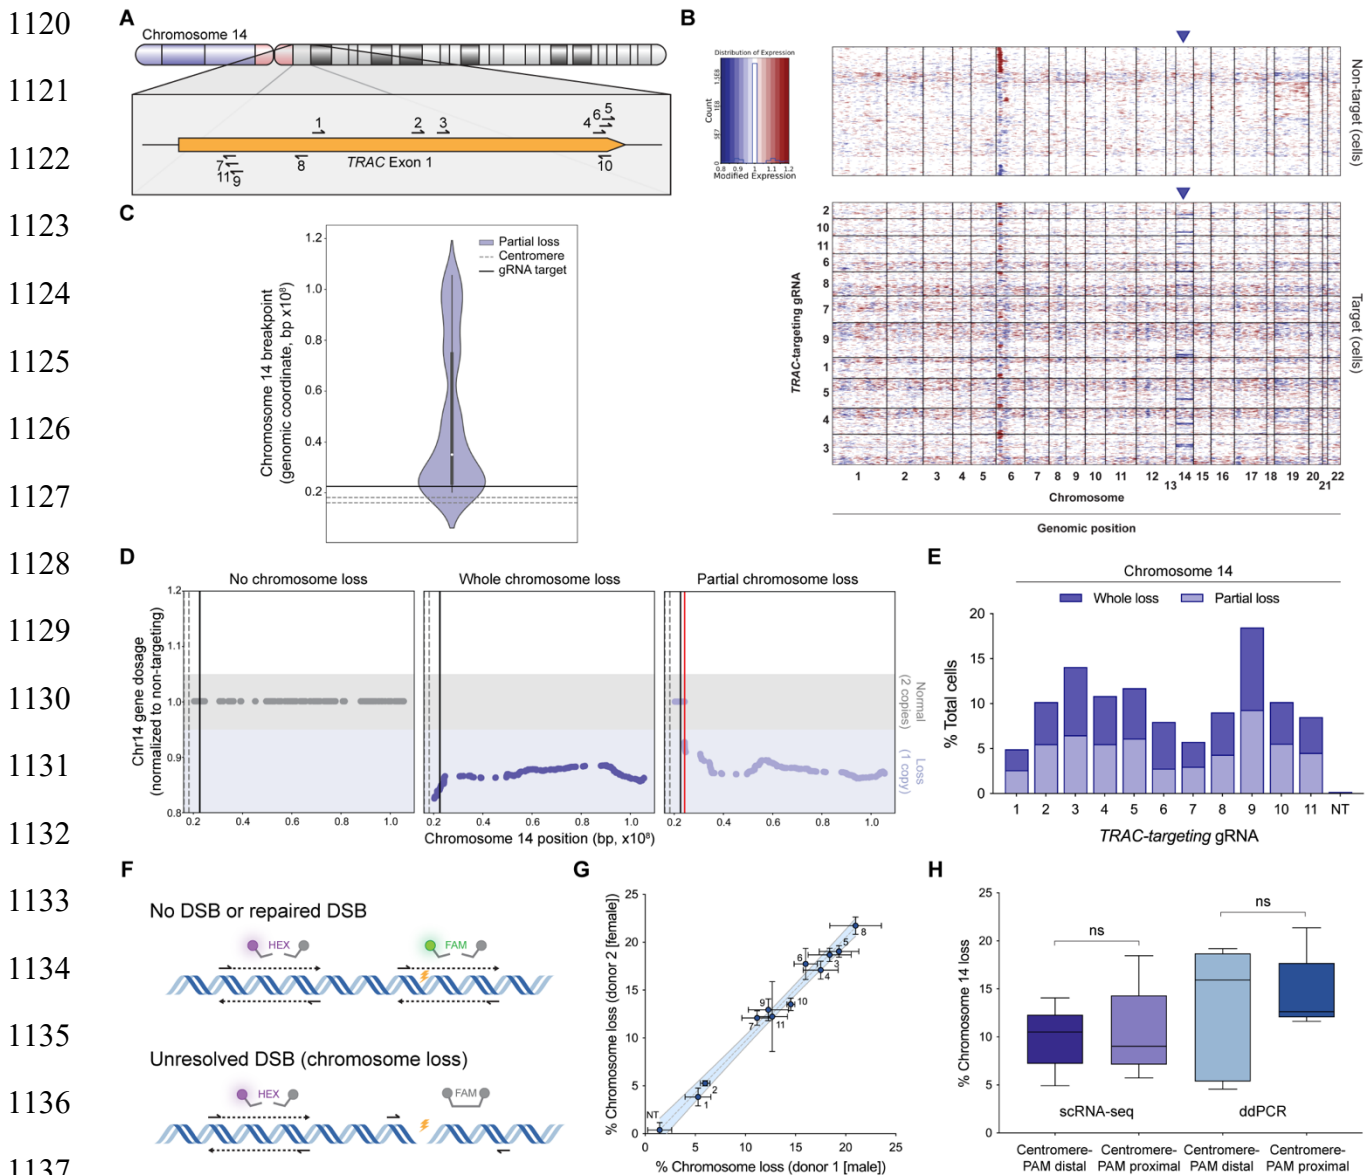

1133 **(A)** Cas9 gRNA target sites tiled across the first exon of *TRAC* on chromosome 14.

1134 **(B)** Gene dosage from transcriptome-wide scRNA-seq of T cells treated with Cas9 and a non-  
 1141 targeting gRNA (top heatmap) or *TRAC*-targeting gRNA (bottom heatmap). Each individual row  
 1142 corresponds to a single cell and each column corresponds to a specific gene and its genomic  
 1143 position, grouped by chromosome (outlined in black). Red represents increase in gene dosage

1144 while blue represents decrease in gene dosage. Rows outlined in black represent cells treated  
1145 with different *TRAC*-targeting gRNAs. Blue arrows highlight chromosome 14, where *TRAC* is  
1146 located.

1147 **(C)** Distribution of computationally predicted chromosome 14 breakpoints in cells predicted to  
1148 have a chromosomal loss event. The distribution is an aggregate of 11 different *TRAC*-targeting  
1149 gRNAs (all within ~300 bp) in cells with partial chromosome loss.

1150 **(D)** Representative single cell chromosome 14 gene dosage plots illustrating a cell with no  
1151 chromosome loss (left), whole chromosome loss (middle), or partial chromosome loss (right).  
1152 Gene dosage was normalized to non-targeting samples. Gray shaded area (gene dosage of 0.95-  
1153 1.05) represents normal gene dosage (2 copies). Blue shaded area (gene dosage of <0.95)  
1154 represents reduction in gene dosage (1 copy). Dotted lines represent the centromere, black lines  
1155 represent the Cas9 target site, and the red line represents the computationally predicted  
1156 breakpoint.

1157 **(E)** Quantification of whole and partial chromosome 14 loss across all gRNAs from scRNA-seq.  
1158 NT indicates non-targeting gRNA.

1159 **(F)** Schematic of ddPCR assay to measure chromosome loss. The yellow lightning bolt represents  
1160 the Cas9 target site. The detection of both HEX and FAM probes indicates no DSB or repaired  
1161 DSB (top illustration). The detection of the HEX probe but not the FAM probe indicates an  
1162 unresolved DSB that represents chromosome loss (bottom illustration).

1163 **(G)** Quantification of chromosome loss at the Cas9 target site across all gRNAs from ddPCR (n  
1164 = 3, n = 2 biological donors). Numbers next to each point represent the *TRAC*-targeting gRNA.  
1165 NT indicates non-targeting gRNA and represents samples from four different ddPCR amplicons.  
1166 Error bars represent the standard deviation from the mean. Dashed line represents linear  
1167 regression line of best fit and shaded region represent 95% confidence intervals (Slope = 1.082,  
1168  $R^2 = 0.9853$ ).

1169 **(H)** Comparison of chromosome 14 loss between *TRAC*-targeting conditions where the PAM is  
1170 distal (Centromere-PAM distal) or proximal (Centromere-PAM proximal) to the centromere  
1171 relative to the gRNA spacer sequence. Chromosome 14 loss was measured by scRNA-seq (n =  
1172 1 biological donor) or ddPCR (n = 3, n = 2 biological donors). *P*-values are from Welch's unpaired  
1173 t-tests and are from left to right 0.8689 and 0.7338. ns = not significant.

1174

1175

1176

1177

1178

1179

1180

1181

1182

1183

1184

1185

1186

1187

1188

1189

1190

1191

1192

1193

1194



1195 **Figure 2: Genome-scale CRISPR-Cas9 screen reveals target-specific chromosome loss**

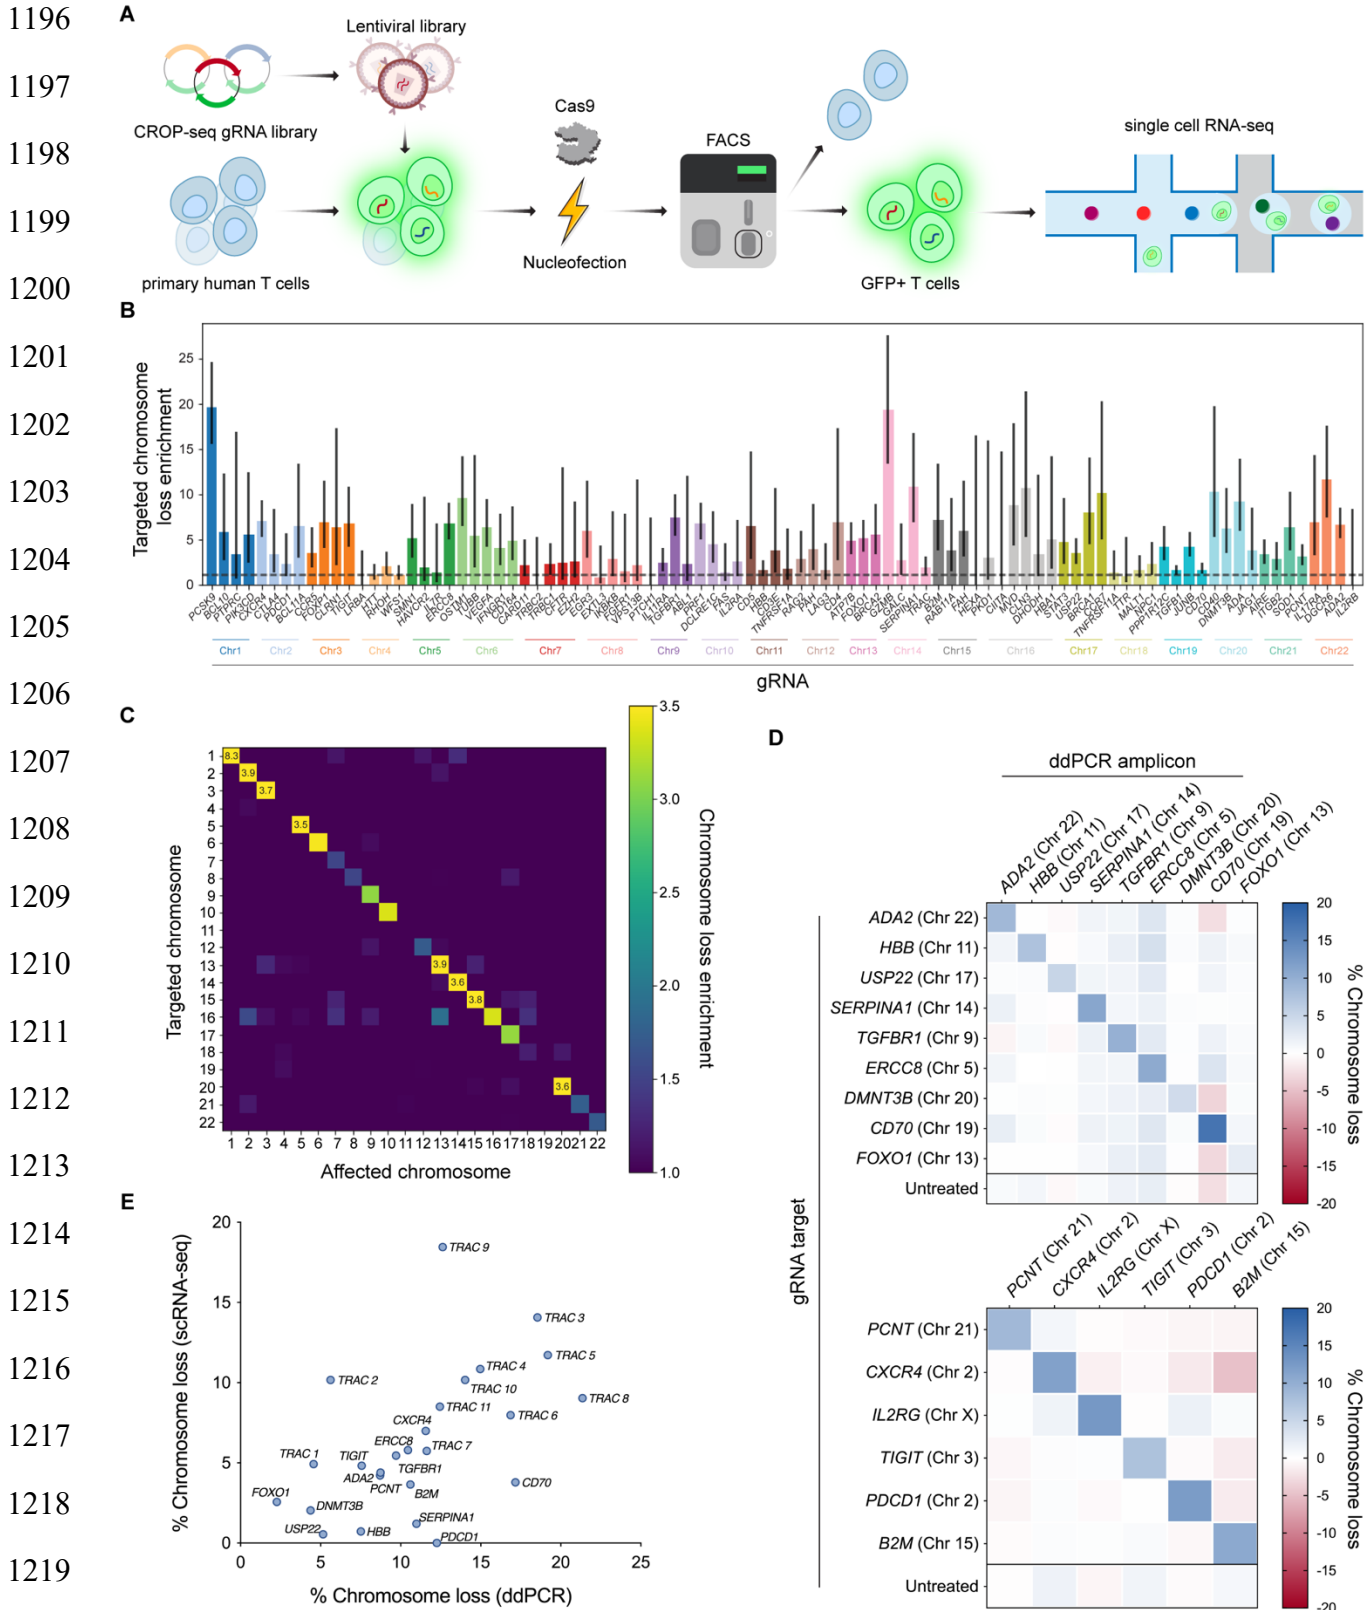

1220 **(A)** Workflow for a CRISPR-Cas9 screen to estimate chromosome loss in T cells. Primary human  
1221 T cells were transduced with a CROP-seq lentiviral library expressing one of 384 gRNAs. Cells  
1222 were then nucleofected with Cas9 protein, before GFP<sup>+</sup> cells (co-expressed on the CROP-seq  
1223 gRNA vector) were enriched via fluorescence-activated cell sorting. Enriched cells were subject  
1224 to scRNA-seq and downstream analysis.

1225 **(B)** Quantification of targeted chromosome loss enrichment for each target gene. Each of the 92  
1226 bars represents the combination of four unique gRNAs targeting the same gene. Chromosome  
1227 loss enrichment was calculated relative to the baseline loss per chromosome in cells containing  
1228 a gRNA targeting a different chromosome. Error bars represent 95% confidence intervals.

1229 **(C)** Chromosomal loss enrichment at each somatic chromosome across all gRNAs. Rows  
1230 represent the chromosome targeted by the Cas9 gRNA. Columns represent the chromosome  
1231 analyzed for chromosome loss.

1232 **(D)** Chromosome loss measured by ddPCR at 15 different Cas9 target sites across the genome.  
1233 Rows titles indicate the identity of the gRNA used. Column titles indicate the site in the genome  
1234 that was analyzed via ddPCR. Heatmap values represent the mean of replicates ( $n = 3$ , except  $n$   
1235  $= 2$  for *B2M* target column).

1236 **(E)** Correlation between chromosome loss from 25 gRNAs as measured by scRNA-seq and  
1237 ddPCR. Spearman's correlation = 0.59,  $**P = 0.0017$  (two-tailed).

1238

1239

1240

1241

1242

1243

1244

1245

1246 **Figure 3: Genetic and epigenetic factors influence Cas9-induced chromosome loss**

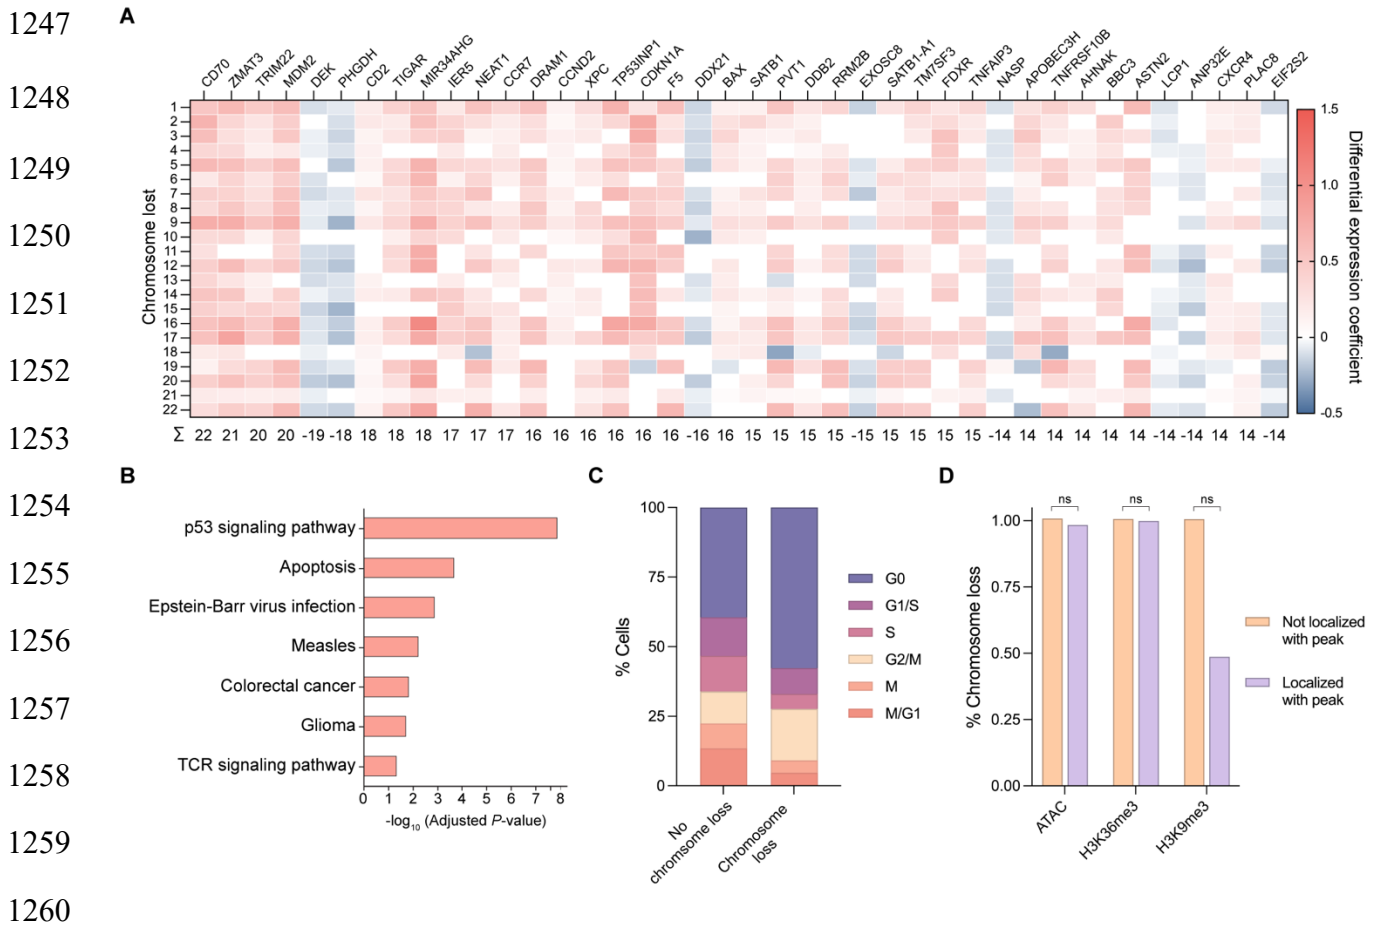

**(A)** Heatmap of differentially expressed genes in cells with chromosome loss compared to cells without chromosome loss. Cells with chromosome loss were divided into 22 groups depending on which somatic chromosome was lost (rows), and differentially expressed genes were individually investigated (columns). Upregulated genes are shown in red while downregulated genes are shown in blue. Genes were given a score of 1 (upregulated), -1 (downregulated), or 0 (no difference) for each chromosome loss group. Summed gene scores across all chromosome loss groups is shown below; genes with a score  $>|13|$  are displayed.

**(B)** Gene ontology analysis based on differential gene expression. The most significantly upregulated modules are displayed.

1270 **(C)** Cell cycle analysis based on expression profiles. The percentage of cells in each cell cycle  
1271 phase were quantified for cells with no chromosome loss or cells with chromosome loss.

1272 **(D)** Influence of epigenetic marks on chromosome loss. The gRNA sequence for cells with or  
1273 without chromosome loss was analyzed for localization within  $\pm 75$  bp of an epigenetic marker  
1274 peak. *P*-values were calculated using a two-sided Fisher's Exact Test and are from left to right  
1275 (ATAC) 0.365496, (H3K36me3) 0.789824, and (H3K9me3) 0.305706. ns = not significant.

1276

1277

1278

1279

1280

1281

1282

1283

1284

1285

1286

1287

1288

1289

1290

1291

1292

1293

1294

1295

1296 **Figure 4: Cas9-induced chromosome loss persists for weeks but results in reduced**  
 1297 **fitness and proliferation**

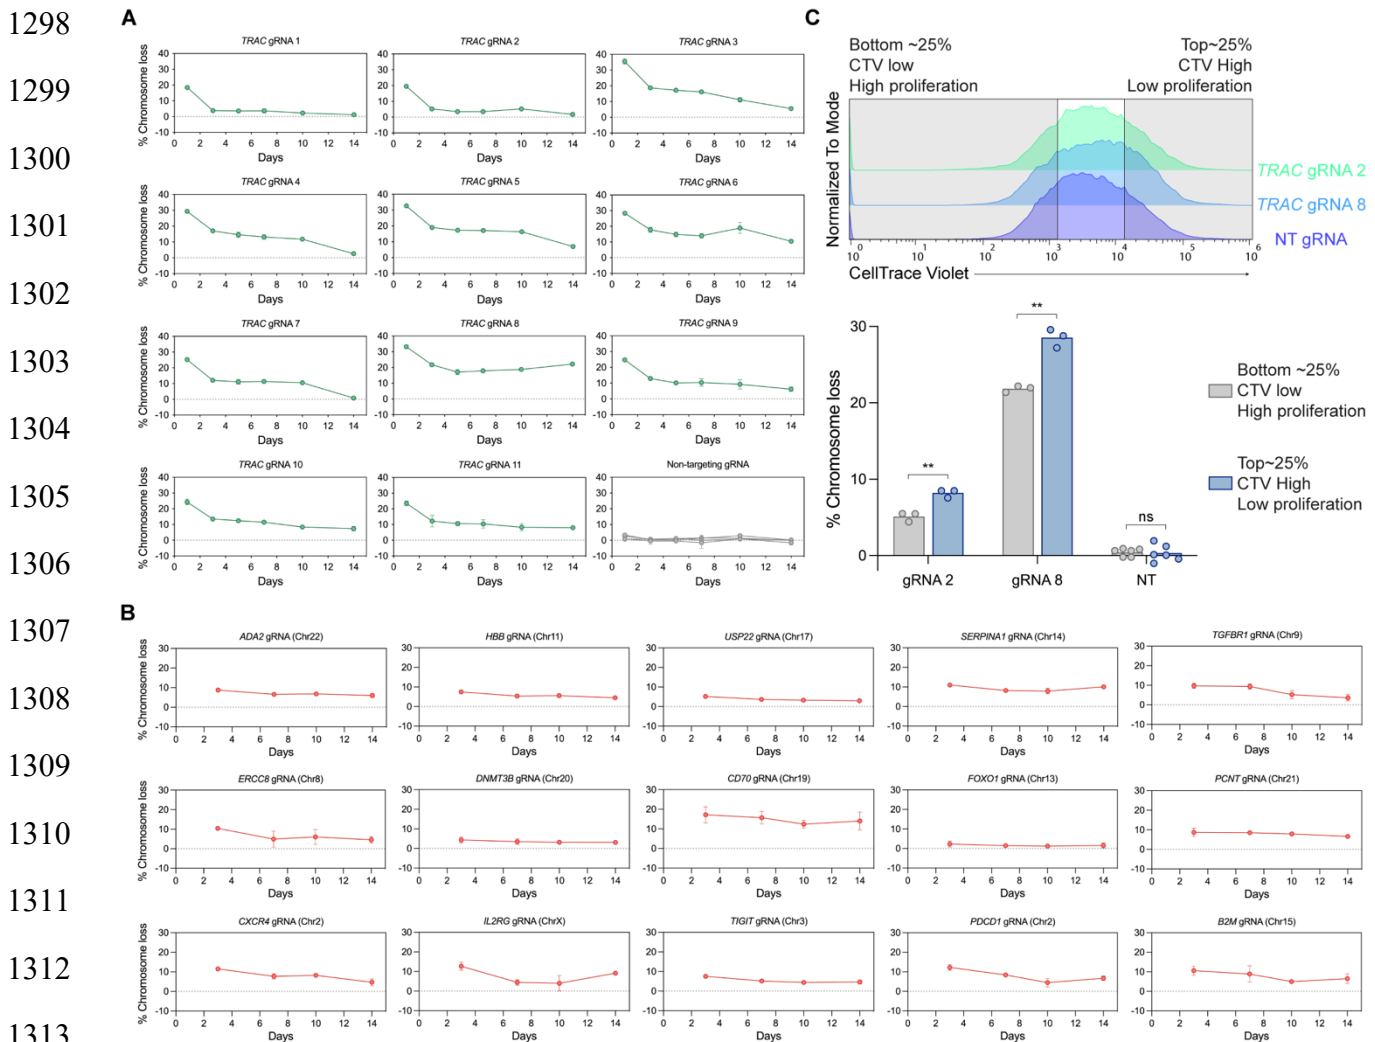

1315 **(A)** ddPCR measurements of chromosome loss at the Cas9 *TRAC* target site over 14 days. Error  
 1316 bars represent the standard deviation from the mean (n = 3). Day 3 results were additionally used  
 1317 as the donor 2 (female) results shown in Fig. 1g.

1318 **(B)** ddPCR measurements of chromosome loss for 15 different gRNAs targeted to sites across  
 1319 the genome over 14 days. Error bars represent the standard deviation from the mean (n = 3,  
 1320 except n = 2 for *B2M*). Day 3 results were additionally used for the diagonal values in the  
 1321 heatmaps of Fig. 2d.

1322 **(C)** Measurement of chromosome loss across T cells of varying proliferative capacity. T cells were  
1323 stained with CellTrace Violet (CTV) and cultured for five days before sorting the top and bottom  
1324 quartile (top panel). ddPCR was used to measure chromosome loss in lowly proliferative (CTV  
1325 high) and highly proliferative (CTV low) populations (bottom panel). NT = non-targeting gRNA.  
1326 Non-targeted samples evaluated for chromosome loss at the gRNA 2 or gRNA 8 amplicon were  
1327 combined into a single column (n = 3 for each of the two different ddPCR amplicons). *P*-values  
1328 are from Welch's unpaired t-tests and from left to right are 0.002970, 0.002970, and 0.275572.

1329

1330

1331

1332

1333

1334

1335

1336

1337

1338

1339

1340

1341

1342

1343

1344

1345

1346

1347

1348 **Figure 5: Pre-clinical CAR T cell production via homology-directed repair results in**  
 1349 **chromosome loss**

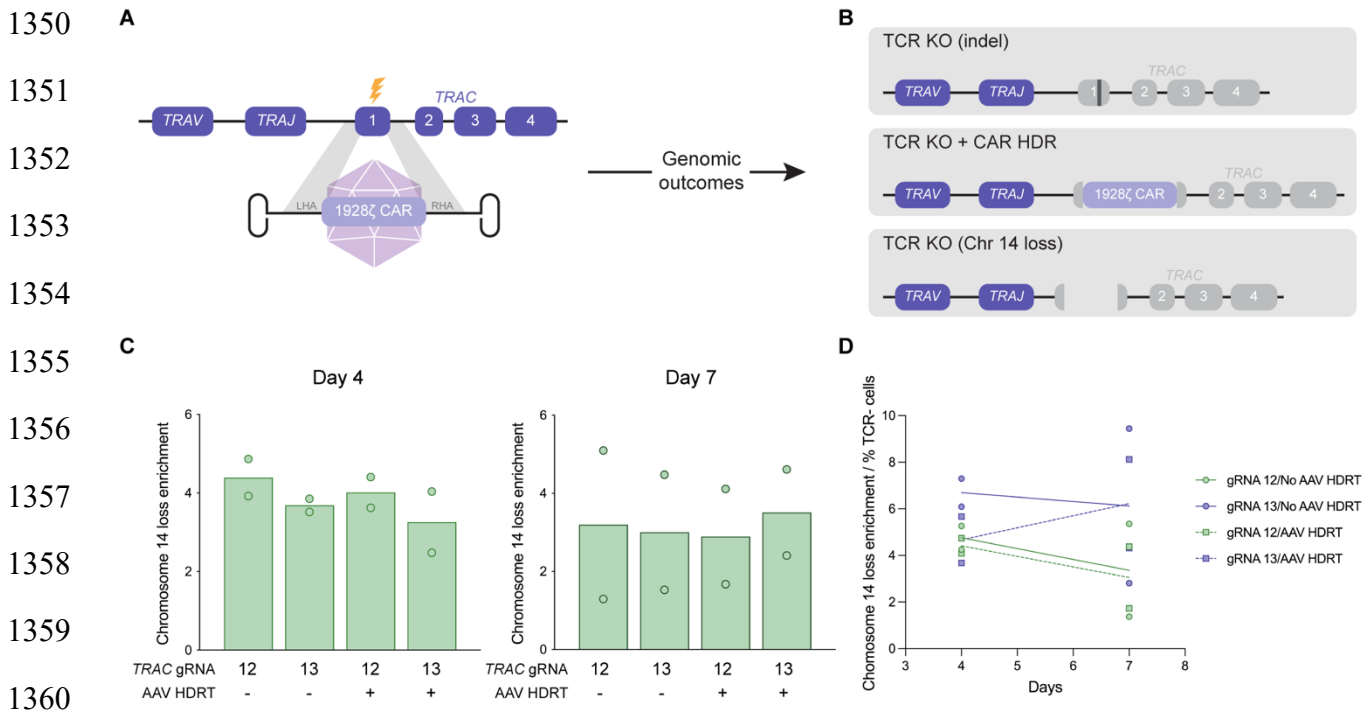

1362 **(A)** Strategy to generate CAR T cells via HDR with Cas9. AAV6 encoding a 1928 $\zeta$  CAR between  
 1363 left and right homology arms (LHA and RHA, respectively) serves as a template for HDR after  
 1364 Cas9 cleavage (yellow lightning bolt) of *TRAC*.

1365 **(B)** Three potential genomic outcomes after Cas9 HDR: indels that disrupt TCR expression (top),  
 1366 insertion of the CAR transgene that simultaneously disrupts TCR expression (middle), and  
 1367 chromosome loss that disrupts TCR expression (bottom).

1368 **(C)** Quantification of chromosome 14 loss enrichment across two *TRAC*-targeting gRNAs with or  
 1369 without an AAV HDR template from scRNA-seq (n = 2 biological donors). Two separate batches  
 1370 of CAR T cells were manufactured, before being subjected to scRNA-seq four or seven days after  
 1371 generation. Chromosome 14 loss enrichment was calculated relative to T cells treated with Cas9  
 1372 and a non-targeting gRNA.

1373 **(D)** Chromosome 14 loss enrichment over time, normalized to Cas9 editing efficacy (n = 2  
1374 biological donors). Editing efficacy was determined by the percentage of TCR negative cells as  
1375 measured via flow cytometry (see Extended Data Fig. 13c).

1376

1377

1378

1379

1380

1381

1382

1383

1384

1385

1386

1387

1388

1389

1390

1391

1392

1393

1394

1395

1396

1397



1398 **Figure 6: Clinical CRISPR-Cas9 genome editing protocol in patient T cells mitigates**  
 1399 **chromosome loss**

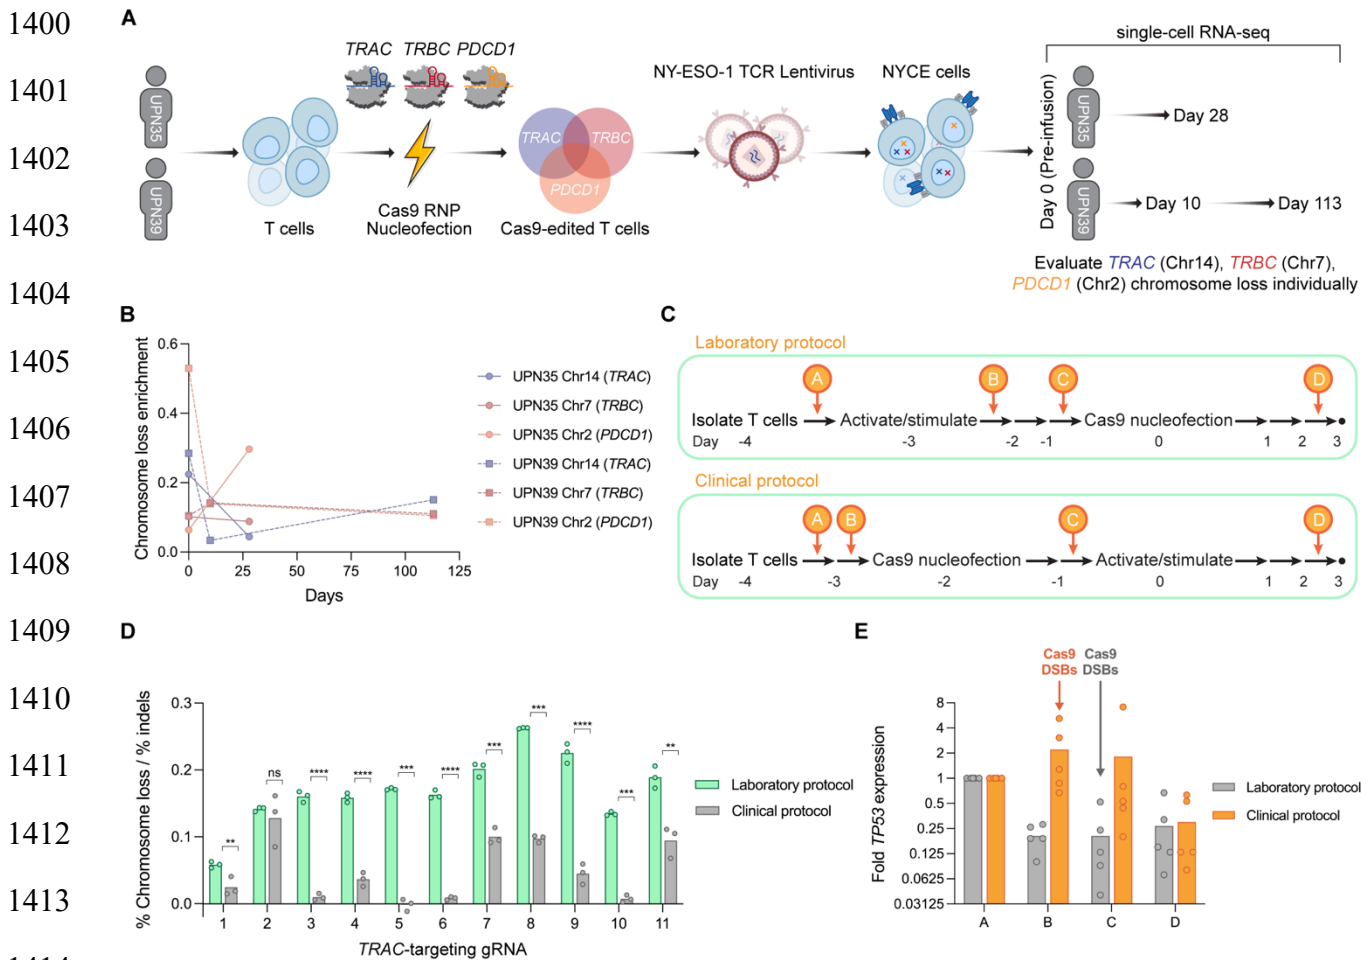

1424 NYCE cells prior to infusion, while other later timepoints represent NYCE cells that were collected  
1425 after circulation *in vivo*.

1426 **(C)** Diagram of two different protocols for Cas9 genome editing of primary human T cells. The  
1427 laboratory protocol (top) consisted of activating/stimulating cells prior to Cas9 nucleofection, and  
1428 was used throughout this study. The clinical protocol (bottom) consisted of nucleofecting cells  
1429 with Cas9 prior to activating/stimulating and is representative of our clinical trial.

1430 **(D)** Relative chromosome loss with 11 different *TRAC*-targeting gRNAs using the laboratory or  
1431 clinical protocol in primary human T cells. Chromosome loss was normalized to the indel efficacy  
1432 (see Extended Data Fig. 14b). *P*-values are from Welch's unpaired t-tests and from left to right  
1433 are 0.008320, 0.111695, 0.000052, 0.000076, 0.000159, 0.000073, 0.000125, 0.000087,  
1434 0.000073, 0.000050, and 0.001416.

1435 **(E)** Fold *TP53* mRNA expression during the laboratory or clinical protocols for Cas9 genome  
1436 editing of primary human T cells ( $n = 5$  biological donors). Data points are the mean of two  
1437 technical replicates. X-axis letters correspond to timepoints in Fig. 6c. "Cas9 DSBs" represents  
1438 the timepoints in the laboratory or clinical protocols where Cas9 was nucleofected into T cells to  
1439 generate DSBs.

1440

1441

1442

1443

1444

1445

1446

1447

1448

1449

1450 **Figure S1: CRISPR-Cas9 genome editing results in chromosome loss regardless of guide**  
 1451 **RNA orientation or genomic position, related to Figure 1**

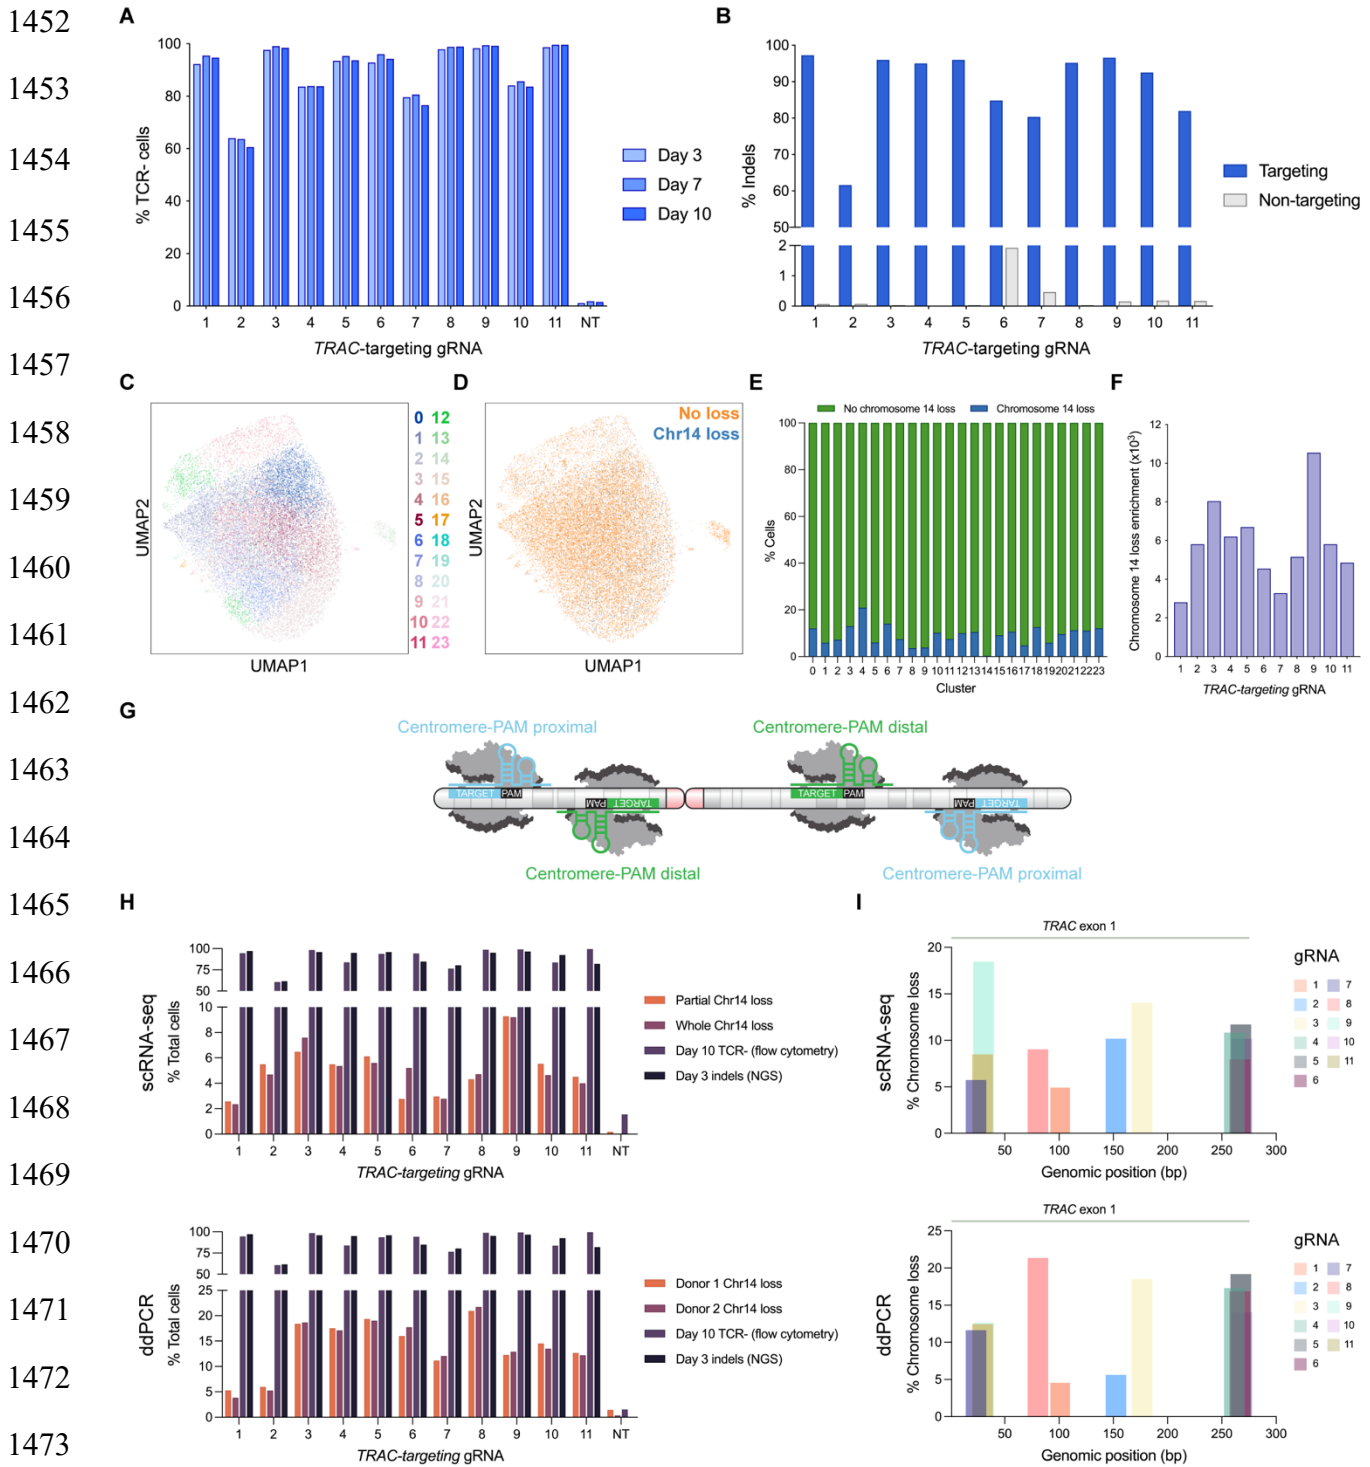

1475 **(A)** TCR disruption from Cas9 genome editing of *TRAC*. TCR expression was measured via flow  
1476 cytometry at 3, 7, and 10 days post-nucleofection. NT indicates non-targeting gRNA.

1477 **(B)** Indels at the *TRAC* locus (targeting) from Cas9 genome editing as measured by next-  
1478 generation sequencing. Cells treated with a non-targeting gRNA were evaluated for indels at each  
1479 of the *TRAC* target sequences (non-targeting).

1480 **(C)** UMAP projection of T cells edited with a *TRAC*-targeting or non-targeting gRNA.

1481 **(D)** The UMAP projection of T cells within the *TRAC* editing experiment was overlaid with  
1482 estimations of whether the cell had chromosome 14 loss or not (whole or partial chromosome  
1483 loss).

1484 **(E)** Percentage of cells with chromosome 14 loss per cluster (see Fig. S1D).

1485 **(F)** Quantification of chromosome 14 loss enrichment across 11 different *TRAC*-targeting gRNAs.  
1486 Chromosome 14 loss enrichment was calculated relative to T cells treated with Cas9 and a non-  
1487 targeting gRNA.

1488 **(G)** Schematic of gRNA orientation relative to the centromere. Cas9 targets where the PAM was  
1489 proximal to the centromere (red) relative to the target DNA sequence were considered  
1490 centromere-PAM proximal (blue), while Cas9 targets where the PAM was distal to the centromere  
1491 relative to the target DNA sequence were considered centromere-PAM distal (green).

1492 **(H)** Comparison of TCR disruption (by flow cytometry or next-generation sequencing) and  
1493 chromosome 14 loss as measured by scRNA-seq (top) or ddPCR (bottom).

1494 **(I)** Chromosome 14 loss by scRNA-seq (combination of whole and partial chromosome 14 loss,  
1495 top) or ddPCR (mean of n = 3 replicates, n = 2 biological donors, bottom) for each gRNA based  
1496 on target position within the *TRAC* gene. Gray line indicates the first exon of *TRAC* (274 bp).

1497

1498

1499

1500

1501 **Figure S2: CROP-seq reveals genome-scale breakpoints and chromosome loss, related**  
 1502 **to Figure 2**

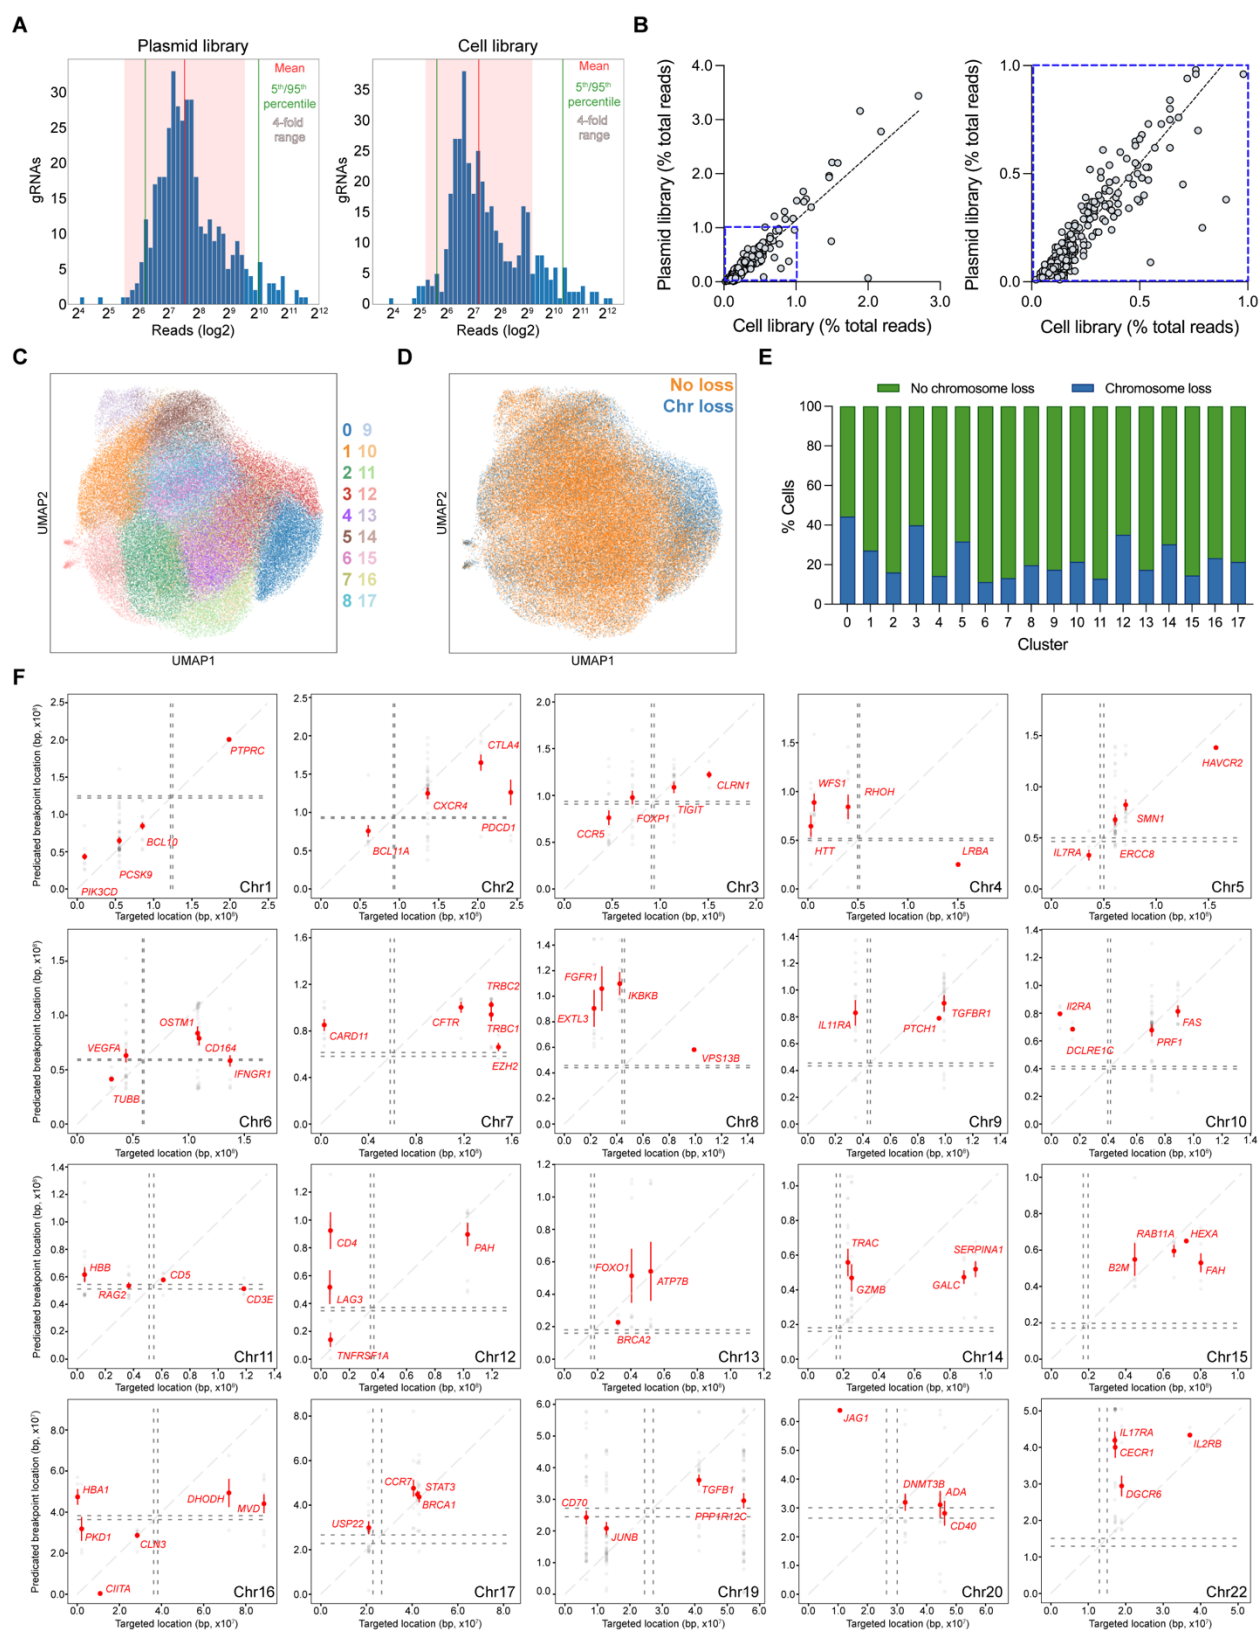

1527 **(A)** Distribution of next-generation sequencing reads for each gRNA in the CROP-seq gRNA  
1528 library as a plasmid (left) or once integrated into T cells via lentivirus (right). The mean is shown  
1529 as a red line, 5<sup>th</sup> and 95<sup>th</sup> quartiles are shown as green lines, and a 4-fold range to either side of  
1530 the mean is shown as a pink shaded area.

1531 **(B)** Correlation between gRNA reads in the plasmid library and cell library. A zoomed in  
1532 perspective (blue dashed line, left) is shown in a separate panel (blue dashed line, right). Dashed  
1533 gray line represents the linear regression line of best fit (Slope = 1.189,  $R^2 = 0.8348$ ).

1534 **(C)** UMAP projection of T cells from the CROP-seq screen.

1535 **(D)** The UMAP projection of T cells within the CROP-seq screen was overlaid with estimations  
1536 of whether the cell had a targeted chromosome loss or not (whole or partial chromosome loss).

1537 **(E)** Percentage of cells with targeted chromosome loss per cluster (see Fig. S2C).

1538 **(F)** Predicted breakpoint location versus intended gRNA target location from the CROP-seq  
1539 screen. gRNAs are grouped by targeted chromosome. Chromosomes 18 and 21 are omitted  
1540 because no partial chromosome loss was detected. Red data points represent the mean and 95%  
1541 confidence interval.

1542

1543

1544

1545

1546

1547

1548

1549

1550

1551

1552

1553 **Figure S3: Influence of genetic context and Cas9 gRNA sequence on chromosome loss,**  
 1554 **related to Figure 2**

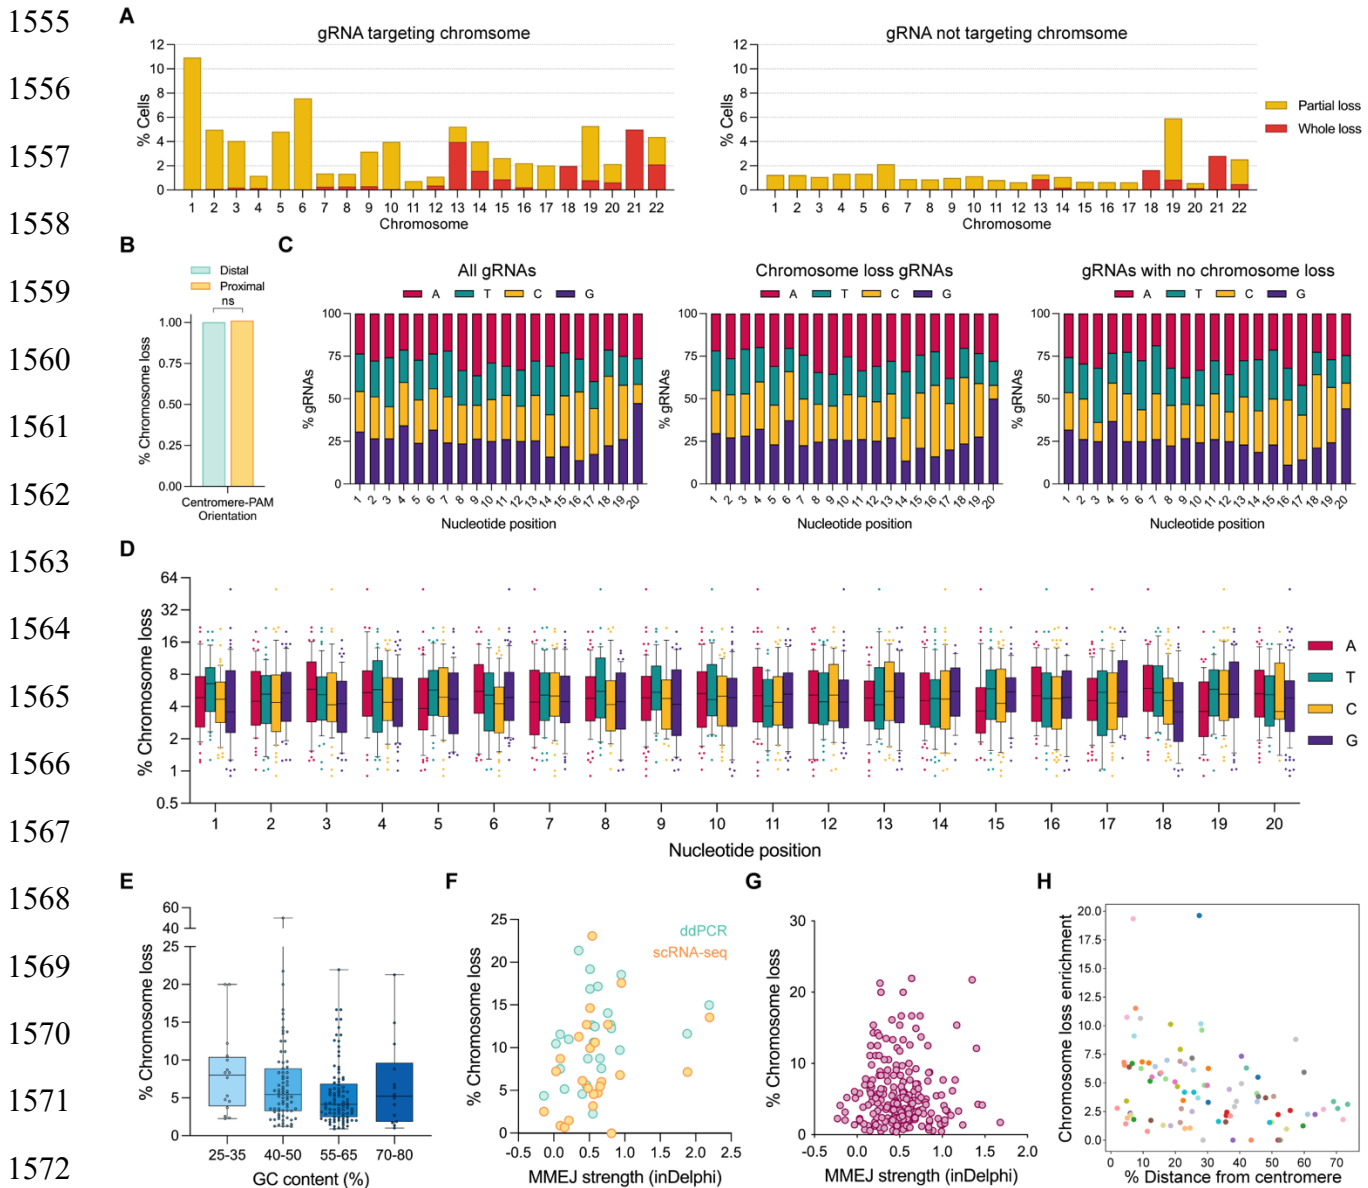

1563  
 1564  
 1565  
 1566  
 1567  
 1568  
 1569  
 1570  
 1571  
 1572  
 1573  
 1574 **(A)** Partial and whole chromosome loss from the CROP-seq screen. Chromosome loss was  
 1575 quantified at chromosomes where the gRNA was targeting that specific chromosome (left) or at  
 1576 chromosomes not targeted by the gRNA (right). Chromosome loss at chromosomes not targeted  
 1577 by the gRNA was used to calculate baseline noise.



1578 **(B)** Influence of gRNA orientation on chromosome loss. gRNAs where the PAM is distal to the  
1579 centromere relative to the gRNA target sequence were compared against gRNAs where the PAM  
1580 is proximal to the centromere relative to the gRNA target sequence. *P*-value was calculated using  
1581 a two-sided Fisher's Exact Test and was 0.592413. ns = not significant.

1582 **(C)** Distribution of nucleotides across each position of the gRNA spacer within the CROP-seq  
1583 library. Distribution for all gRNAs (left), gRNAs that resulted in chromosome loss (middle), and  
1584 gRNAs that did not result in chromosome loss (right).

1585 **(D)** Chromosome loss by nucleotide identity across each position of the gRNA spacer within the  
1586 library.

1587 **(E)** Chromosome loss by gRNA spacer sequence GC content. gRNAs were arbitrarily binned by  
1588 varying levels of GC content.

1589 **(F)** Chromosome loss versus computationally predicted MMEJ influence for Cas9 RNP  
1590 nucleofection experiments (teal = ddPCR measurements, yellow = scRNA-seq measurements.  
1591 Chromosome loss rates are identical to Fig. 2e). ddPCR Spearman's correlation = 0.40, \**P* =  
1592 0.04 (two-tailed); scRNA-seq Spearman's correlation = 0.27, *P* = 0.19 (two-tailed).

1593 **(G)** Chromosome loss versus computationally predicted MMEJ influence for the CROP-seq  
1594 screen experiment. gRNAs with non-zero chromosome loss were plotted. Spearman correlation  
1595 = -0.08, *P* = 0.25 (two-tailed).

1596 **(H)** Chromosome loss by position along the target chromosome. Distance from the centromere  
1597 was normalized to the length of the target chromosome. Spearman's correlation = -0.34, \*\*\**P* =  
1598 0.0009 (two-tailed).

1599

1600

1601

1602

1603



1604 **Figure S4: Cas9-induced chromosome loss is associated with differential gene**  
 1605 **expression and a fitness disadvantage, related to Figure 3 and Figure 4**

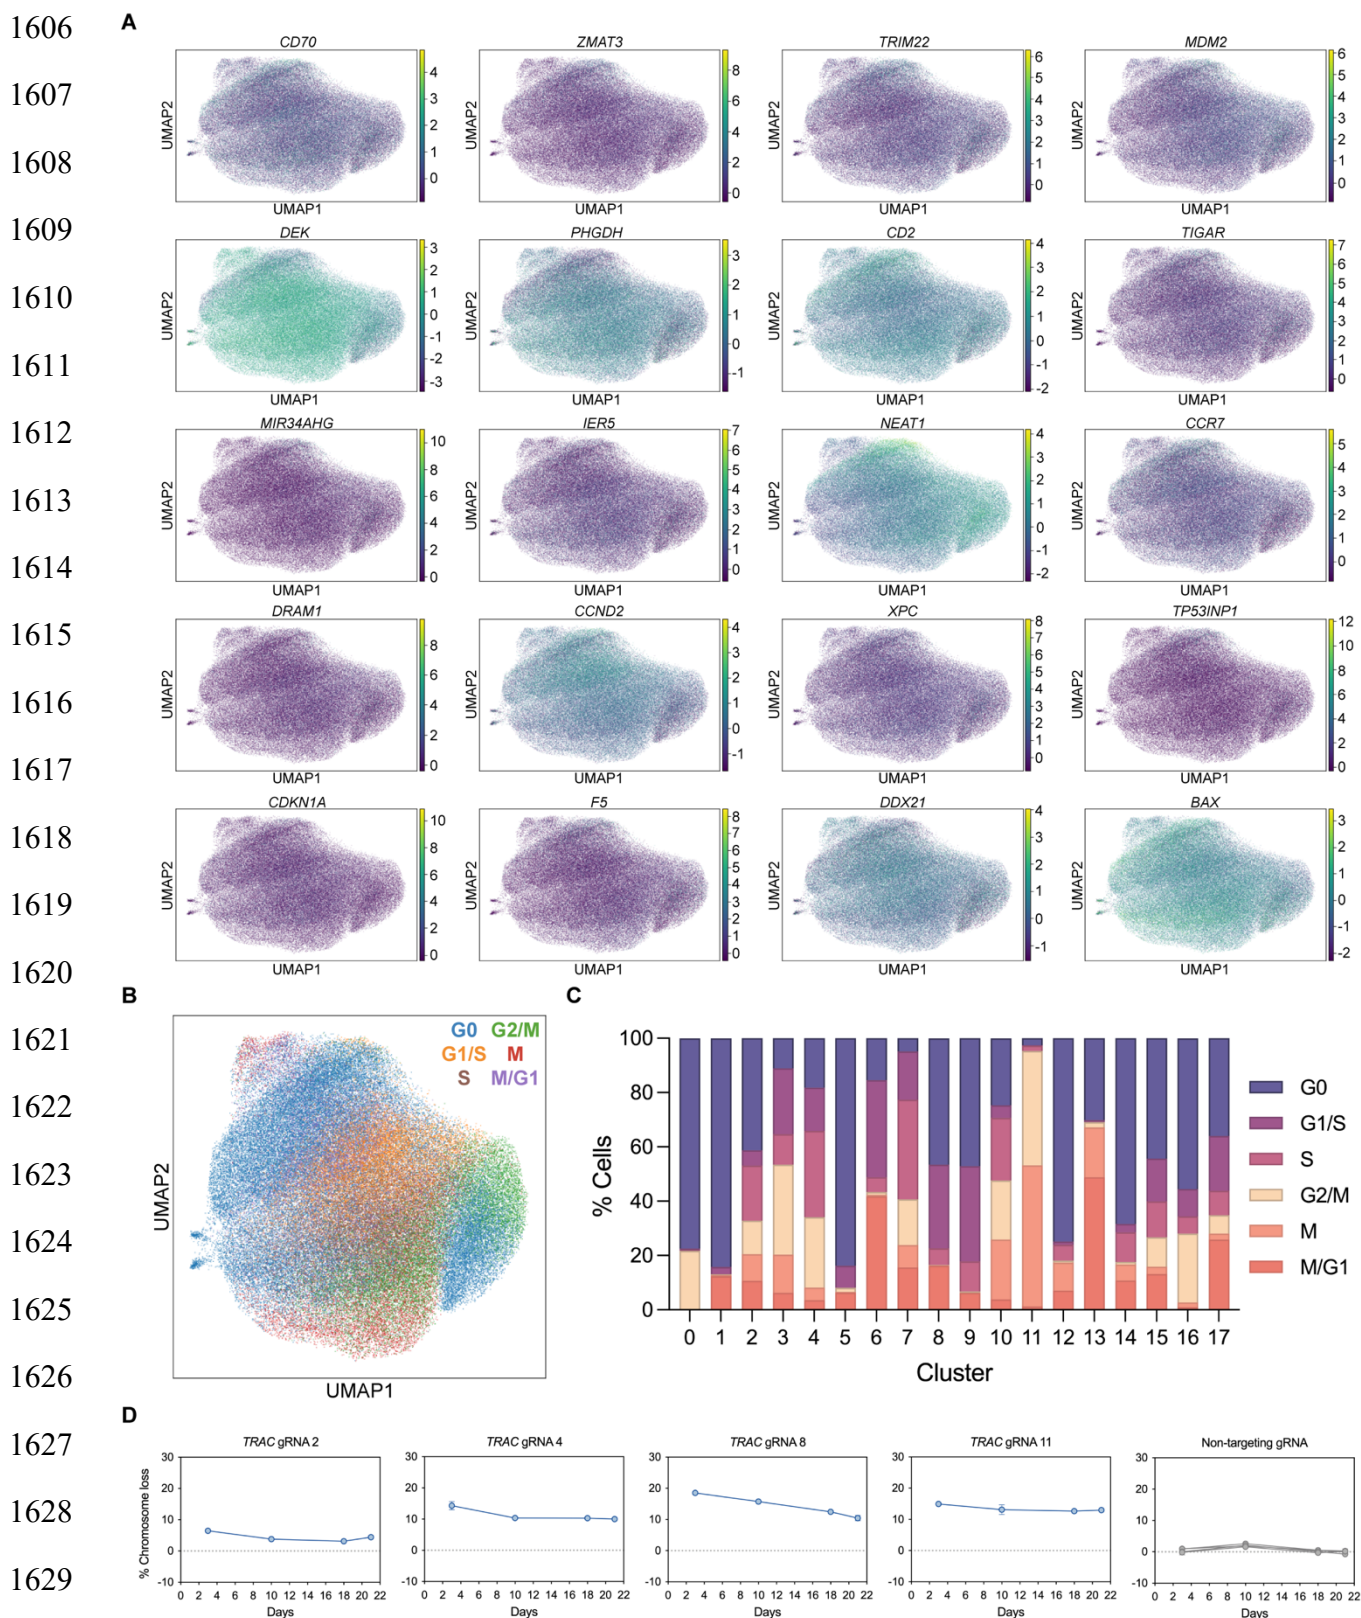

1630 **(A)** UMAP projections of T cells within the CROP-seq screen. Gene expression was overlaid  
1631 onto the projections for the top 20 genes that were most differentially expressed across cells that  
1632 had chromosome loss.

1633 **(B)** UMAP projection of T cells within the CROP-seq screen overlaid with cell cycle markers  
1634 (see Fig. S2C).

1635 **(C)** Quantification of cell cycle states across the different clusters (see Fig. S2C).

1636 **(D)** ddPCR measurements of chromosome loss at the Cas9 *TRAC* target site over 21 days. Error  
1637 bars represent the standard deviation from the mean (n = 3).

1638

1639

1640

1641

1642

1643

1644

1645

1646

1647

1648

1649

1650

1651

1652

1653

1654

1655

1656 **Figure S5: CRISPR-Cas9 homology-directed repair results in chromosome loss, related**  
 1657 **to Figure 5**

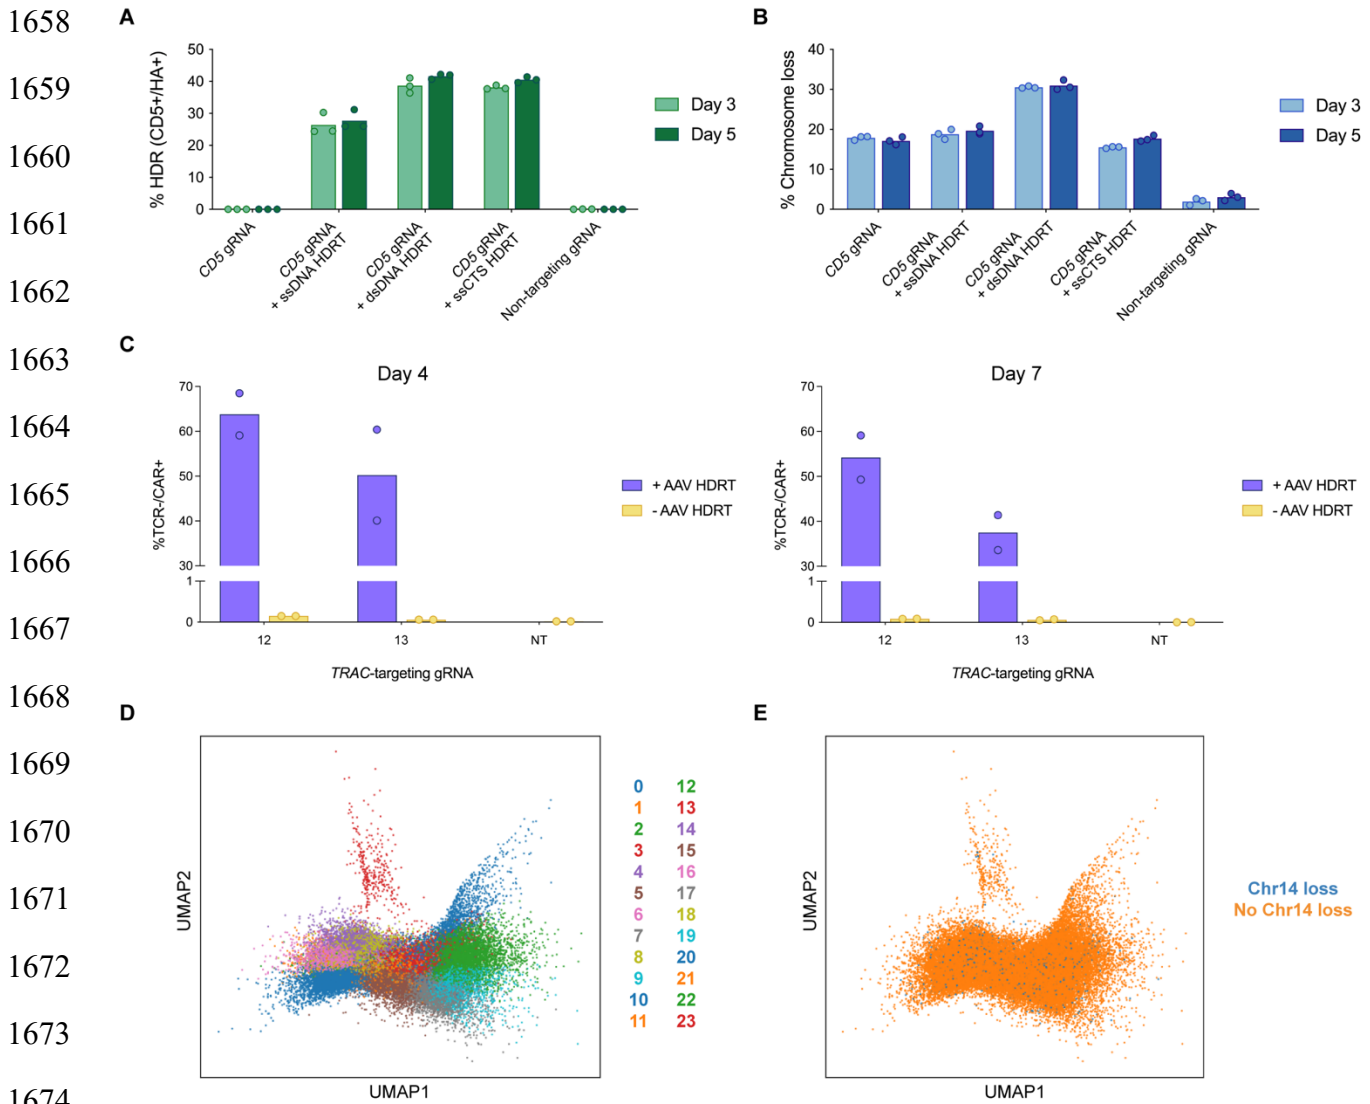

1676 **(A)** HDR efficacy 3 or 5 days post-nucleofection, determined by measuring CD5+/HA+ T cells via  
 1677 flow cytometry.

1678 **(B)** Chromosome loss at the target *CD5* locus via ddPCR, 3 or 5 days post-nucleofection.

1679 **(C)** HDR efficacy determined by measuring TCR-/CAR+ T cells via flow cytometry, four or seven  
 1680 days post-nucleofection. Two separate nucleofections/transductions were conducted for the  
 1681 different time points (n = 2 biological donors).

1682 **(D)** UMAP projection of CAR T cells generated via Cas9 HDR. Projection is an aggregate of two  
1683 biological donors and multiple time points.

1684 **(E)** Distribution of CAR T cells with chromosome 14 loss across the UMAP projection (whole or  
1685 partial chromosome loss).

1686

1687

1688

1689

1690

1691

1692

1693

1694

1695

1696

1697

1698

1699

1700

1701

1702

1703

1704

1705

1706

1707

1708 **Figure S6: Clinical CRISPR-Cas9 genome editing protocol reduces chromosome loss in T**  
 1709 **cells, related to Figure 6**

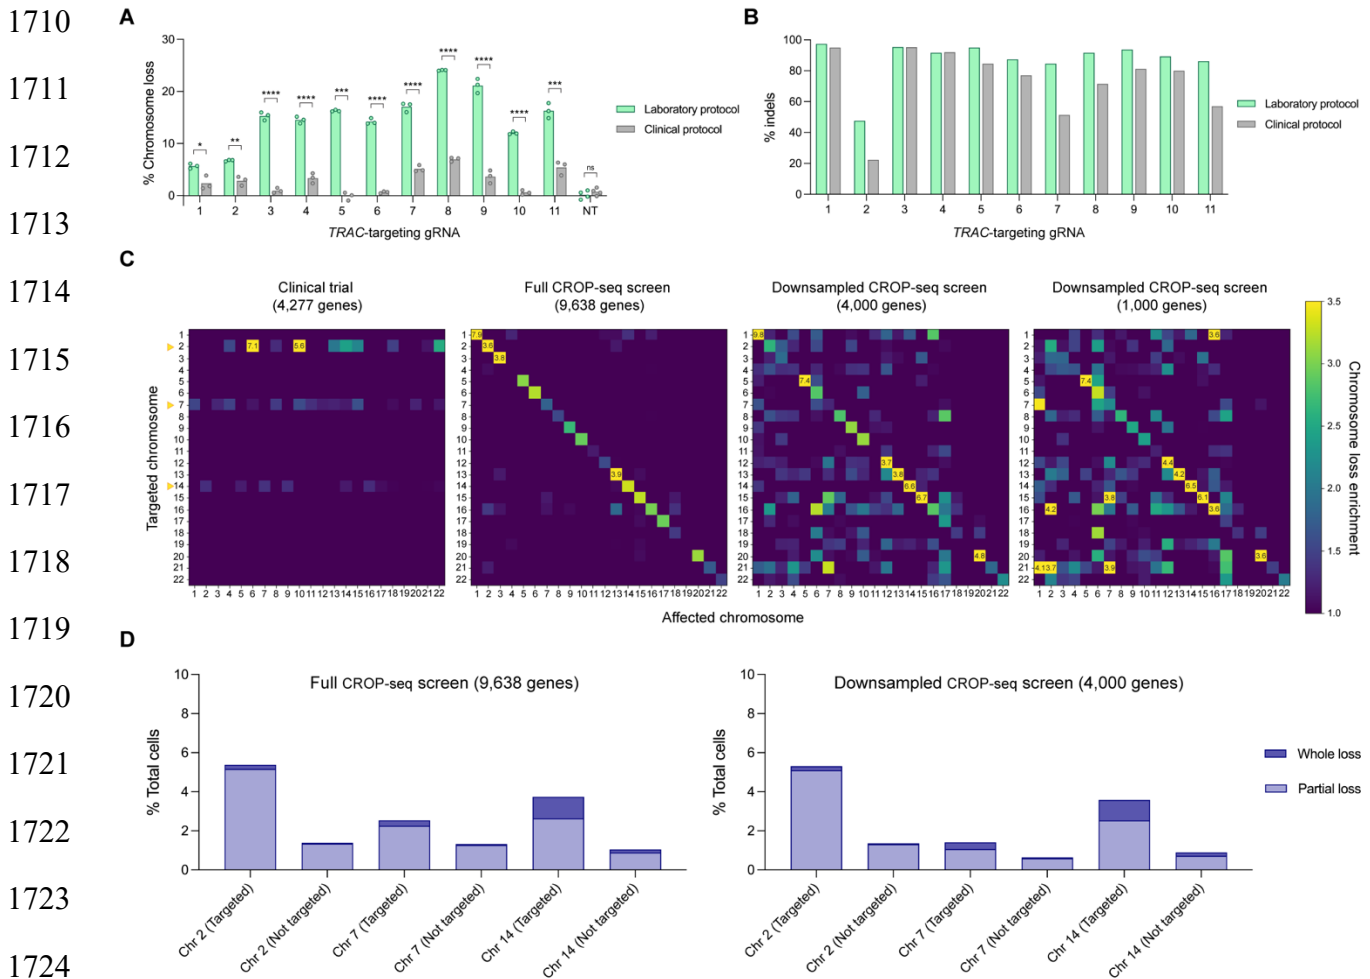

1726 **(A)** Chromosome loss with 11 different *TRAC*-targeting gRNAs or a non-targeting gRNA (NT)  
 1727 using the laboratory or clinical protocol in T cells ( $n = 3$ ). *P*-values are from Welch's unpaired *t*-  
 1728 tests and from left to right are 0.010220, 0.004303, 0.000063, 0.000083, 0.000170, 0.000083,  
 1729 0.000063, 0.000063, 0.000063, 0.000031, 0.000224, and 0.079286.

1730 **(B)** Indels measured by next-generation sequencing at the *TRAC* locus by Cas9 genome editing  
 1731 with the laboratory or clinical protocol.

1732 **(C)** Downsampling analysis to investigate the influence of total genes on chromosome loss  
 1733 enrichment. Rows represent the chromosome targeted by Cas9 and its gRNA. Columns represent

1734 the chromosome analyzed for chromosome loss. Chromosomal loss enrichment for all clinical  
1735 trial patients and timepoints was evaluated only when targeting chromosomes 2 (*PDCD1*), 7  
1736 (*TRBC*), and 14 (*TRAC*) (yellow arrows, left heatmap). 4,277 total genes were detected in the  
1737 clinical trial dataset. The full CROP-seq screen dataset (9,638 genes, second from left) was  
1738 downsampled to 4,000 genes (second from right) or 1,000 genes (right) to evaluate the influence  
1739 of total genes on chromosomal loss enrichment.

1740 **(D)** Quantification of whole and partial chromosome loss at chromosomes 2, 7, and 14 from the  
1741 CROP-seq screen. Chromosome loss was measured at the specific chromosome targeted by the  
1742 Cas9 gRNA (targeted) or at chromosomes not targeted by the Cas9 gRNA (not targeted), from  
1743 the full CROP-seq screen dataset (left) or the CROP-seq screen dataset downsampled to mimic  
1744 the clinical trial dataset (right).
